# Supplementary material for: X/Y platinum(ii) complexes: some features of supramolecular assembly via halogen bonding
Source: Royal Society of Chemistry journal article supplement (doi:10.1039/d3dt02970k), 2023-01-01
Supplement: d3dt02970k2.pdf [file d3dt02970k2.pdf]

## Supplementary Information

### **X/Y Platinum(II) complexes: some features of supramolecular assembly *via* halogen bonding**

Anastasia Yu. Gitlina,<sup>a</sup> Stanislav Petrovskii,<sup>b</sup> Maksim Luginin,<sup>b</sup> Alexey Melnikov,<sup>c</sup> Elena Rychagova,<sup>d</sup> Sergey Ketkov,<sup>d\*</sup> and Elena Grachova<sup>b\*</sup>

<sup>a</sup> Institut des Sciences et Ingénierie Chimiques, École Polytechnique Fédérale de Lausanne (EPFL), 1015 Lausanne, Switzerland

<sup>b</sup> Institute of Chemistry, St Petersburg University, Universitetskii pr. 26, 198504 St. Petersburg, Russia

<sup>c</sup> Centre for Nano- and Biotechnologies, Peter the Great St. Petersburg Polytechnic University, 195251 St. Petersburg, Russia

<sup>d</sup> G.A. Razuvaev Institute of Organometallic Chemistry, the Russian Academy of Sciences, 603950 Nizhny Novgorod, Russia

Correspondence: [e.grachova@spbu.ru](mailto:e.grachova@spbu.ru), [sketkov@iomc.ras.ru](mailto:sketkov@iomc.ras.ru)

## Content

|                    |                                                                                                                                                                      |    |
|--------------------|----------------------------------------------------------------------------------------------------------------------------------------------------------------------|----|
| <b>Scheme S1.</b>  | Numeration of Pt(II) complexes <b>1Y–4Y</b> (Y = Cl, Br, I). .....                                                                                                   | 5  |
|                    | X-Ray structure determination .....                                                                                                                                  | 6  |
| <b>Table S1.</b>   | Crystallographic data for compounds <b>1Cl, 1Br, 2Br, 3I</b> and <b>4Cl</b> . .....                                                                                  | 7  |
| <b>Table S2.</b>   | Crystallographic data for compounds <b>1I, 2Cl, 3Cl</b> and <b>4Br</b> . .....                                                                                       | 8  |
| <b>Figure S1.</b>  | <sup>1</sup> H NMR spectra of complexes <b>1Y</b> , d <sub>1</sub> -chloroform, r.t. ....                                                                            | 10 |
| <b>Figure S2.</b>  | <sup>1</sup> H <sup>1</sup> H COSY NMR spectrum of complex <b>1Cl</b> , d <sub>1</sub> -chloroform, r.t. ....                                                        | 10 |
| <b>Figure S3.</b>  | <sup>1</sup> H <sup>1</sup> H COSY NMR spectrum of complex <b>1Br</b> , d <sub>1</sub> -chloroform, r.t. ....                                                        | 11 |
| <b>Figure S4.</b>  | <sup>1</sup> H <sup>1</sup> H COSY NMR spectrum of complex <b>1I</b> , d <sub>1</sub> -chloroform, r.t. ....                                                         | 11 |
| <b>Figure S5.</b>  | <sup>1</sup> H NMR spectra of complexes <b>2Y</b> , d <sub>1</sub> -chloroform, r.t. ....                                                                            | 12 |
| <b>Figure S6.</b>  | <sup>1</sup> H <sup>1</sup> H COSY NMR spectrum of complex <b>2Cl</b> , d <sub>1</sub> -chloroform, r.t. ....                                                        | 12 |
| <b>Figure S7.</b>  | <sup>1</sup> H <sup>1</sup> H COSY NMR spectrum of complex <b>2Br</b> , d <sub>1</sub> -chloroform, r.t. ....                                                        | 13 |
| <b>Figure S8.</b>  | <sup>1</sup> H <sup>1</sup> H COSY NMR spectrum of complex <b>2I</b> , d <sub>1</sub> -chloroform, r.t. ....                                                         | 13 |
| <b>Figure S9.</b>  | <sup>1</sup> H NMR spectra of complexes <b>3Y</b> , d <sub>1</sub> -chloroform, r.t. ....                                                                            | 14 |
| <b>Figure S10.</b> | <sup>1</sup> H <sup>1</sup> H COSY NMR spectrum of complex <b>3Cl</b> , d <sub>1</sub> -chloroform, r.t. ....                                                        | 14 |
| <b>Figure S11.</b> | <sup>1</sup> H <sup>1</sup> H COSY NMR spectrum of complex <b>3Br</b> , d <sub>1</sub> -chloroform, r.t. ....                                                        | 15 |
| <b>Figure S12.</b> | <sup>1</sup> H <sup>1</sup> H COSY NMR spectrum of complex <b>3I</b> , d <sub>1</sub> -chloroform, r.t. ....                                                         | 15 |
| <b>Figure S13.</b> | <sup>1</sup> H NMR spectra of complexes <b>4Y</b> , d <sub>1</sub> -chloroform, r.t. ....                                                                            | 16 |
| <b>Figure S14.</b> | <sup>1</sup> H <sup>1</sup> H COSY NMR spectrum of complex <b>4Cl</b> , d <sub>1</sub> -chloroform, r.t. ....                                                        | 16 |
| <b>Figure S15.</b> | <sup>1</sup> H <sup>1</sup> H COSY NMR spectrum of complex <b>4Br</b> , d <sub>1</sub> -chloroform, r.t. ....                                                        | 17 |
| <b>Figure S16.</b> | <sup>1</sup> H <sup>1</sup> H COSY NMR spectrum of complex <b>4I</b> , d <sub>1</sub> -chloroform, r.t. ....                                                         | 17 |
| <b>Figure S17.</b> | Molecular structure of <b>1Cl, 1Br, 3I</b> and <b>4Cl</b> . .....                                                                                                    | 18 |
| <b>Table S3.</b>   | Selected structure parameters of <b>1Cl, 1Br, 2Br, 3I</b> and <b>4Cl</b> . .....                                                                                     | 19 |
| <b>Figure S18.</b> | Molecular structure of <b>1I, 2Cl, 3Cl</b> and <b>4Br</b> . .....                                                                                                    | 20 |
| <b>Table S4.</b>   | Selected structure parameters of <b>1I, 2Cl, 3Cl</b> and <b>4Br</b> . .....                                                                                          | 21 |
| <b>Figure S19.</b> | Fragment of molecular packing of <b>1Y</b> (Y = Cl, Br). The intermolecular $\pi\pi$ distance was measured between the closest atoms, distances are given in Å. .... | 21 |
| <b>Figure S20.</b> | Fragment of molecular packing of <b>2Cl</b> . The intermolecular $\pi\pi$ distance was measured between the closest atoms, distances are given in Å. ....            | 22 |

|                    |                                                                                                                                                                                                                                        |    |
|--------------------|----------------------------------------------------------------------------------------------------------------------------------------------------------------------------------------------------------------------------------------|----|
| <b>Figure S21.</b> | Fragment of molecular packing of <b>3Y</b> (Y = Cl, I). The intermolecular $\pi\pi$ distance was measured between the closest atoms, distances are given in Å. ....                                                                    | 22 |
| <b>Figure S22.</b> | Fragment of molecular packing of <b>4Y</b> (Y = Cl, Br). The intermolecular $\pi\pi$ distance was measured between the closest atoms, distances are given in Å. ....                                                                   | 23 |
| <b>Figure S23.</b> | Fragments of molecular packing of <b>1Y</b> (Y = Br, I) with XB visualization, distances are given in Å.....                                                                                                                           | 23 |
| <b>Figure S24.</b> | Fragments of molecular packing of <b>3Y</b> (Y = Cl, I) with XB visualization, distances are given in Å.....                                                                                                                           | 24 |
| <b>Figure S25.</b> | Fragments of molecular packing of <b>4Br</b> with XB visualization, distances are given in Å. ....                                                                                                                                     | 24 |
| <b>Table S5.</b>   | Structural parameters of XBs of <b>1I</b> , <b>2Cl</b> , <b>3Cl</b> and <b>4Br</b> .....                                                                                                                                               | 24 |
| <b>Table S6.</b>   | Realization of non-covalent interactions in crystal structure of <b>1Y–4Y</b> . ....                                                                                                                                                   | 25 |
| <b>Figure S26.</b> | UV-vis spectra of Pt(II) complexes <b>1Y–4Y</b> (Y = Cl, Br, I), DCE solution $10^{-5}$ M, r.t. ....                                                                                                                                   | 26 |
| <b>Figure S27.</b> | Normalized excitation (dot line) and normalized emission (solid line) spectra of Pt(II) complexes <b>1Y–4Y</b> (Y = Cl, Br, I); DCE solution $10^{-5}$ M, r.t., registration and excitation wavelengths are indicated on diagram. .... | 26 |
| <b>Figure S28.</b> | Variable temperature solid-state emission spectra of complexes <b>1Y–4Y</b> (Y = Cl, Br, I); $\lambda_{\text{ext}}$ 351 nm ( <b>1Y–3Y</b> ) and 365 nm ( <b>4Y</b> ); cr = crystals, gr = ground powder. ....                          | 27 |
| <b>Figure S29.</b> | Normalized emission spectra of complexes <b>1Y–4Y</b> (Y = Cl, Br, I) in solid-state, crystalline samples, 77K.....                                                                                                                    | 28 |
| <b>Table S7.</b>   | Photophysical properties of complexes <b>1Y–4Y</b> (Y = Cl, Br, I) in solid state, crystalline samples, $\lambda_{\text{ext}}$ 351 nm. ....                                                                                            | 29 |
| <b>Table S8.</b>   | Photophysical properties of complexes <b>1Y–4Y</b> (Y = Cl, Br, I) in solid state, ground powder, $\lambda_{\text{ext}}$ 351 nm. ....                                                                                                  | 29 |
| <b>Table S9.</b>   | Observed lifetime (ns) of complexes <b>1Y–4Y</b> (Y = Cl, Br, I) in the solid-state (cr = crystalline samples, gr = ground powder). ....                                                                                               | 30 |
| <b>Table S10.</b>  | Selected parameters of the <b>1Cl–4Cl</b> optimized geometries (in dichloroethane solution). The corresponding experimental parameters in crystal are given in parentheses. ....                                                       | 31 |
| <b>Figure S30.</b> | Selected bond lengths (Å) in the $S_0$ (top) and $T_1$ (bottom) optimized structures of <b>1Cl</b> . The distances changing by more than 0.01 Å on going from $S_0$ to $T_1$ are underlined. ....                                      | 32 |

|                    |                                                                                                                                                                                                                                                                                               |    |
|--------------------|-----------------------------------------------------------------------------------------------------------------------------------------------------------------------------------------------------------------------------------------------------------------------------------------------|----|
| <b>Figure S31.</b> | Selected bond lengths (Å) in the S <sub>0</sub> (top) and T <sub>1</sub> (bottom) optimized structures of <b>3Cl</b> . The distances changing by more than 0.01 Å on going from S <sub>0</sub> to T <sub>1</sub> are underlined. ....                                                         | 32 |
| <b>Figure S32.</b> | Isosurfaces (0.05) and energies (eV) of the <b>1Cl-4Cl</b> α-HOMO and α-HOMO-1 in the T <sub>1</sub> state. ....                                                                                                                                                                              | 33 |
| <b>Figure S33.</b> | Mulliken charge distribution (a) and ESP mapped on the ED isosurface (b, c) in the <b>2Cl</b> molecule in dichloroethane solution. The ED isovalue is 0.001 a.u. (a) and 0.01 a.u. (b)...<br>.....                                                                                            | 33 |
| <b>Figure S34.</b> | Molecular graph of the <b>1Cl</b> dimer obtained from analysis of the electron density topology. Bonding critical points (3,-1) are presented as small green spheres. Electron densities (a.u., black) and potential energy densities (a.u., red) are given for selected critical points..... | 34 |
| <b>Figure S35.</b> | Calculated electronic absorption spectra of <b>1Cl-4Cl</b> in dichloroethane. ....                                                                                                                                                                                                            | 34 |
| <b>Figure S36.</b> | Calculated adiabatic and vertical energies of the T <sub>1</sub> →S <sub>0</sub> emission in <b>1Cl-4Cl</b> (dichloroethane solution). The experimental vertical energies are given for comparison. ....                                                                                      | 35 |
| References         | .....                                                                                                                                                                                                                                                                                         | 35 |

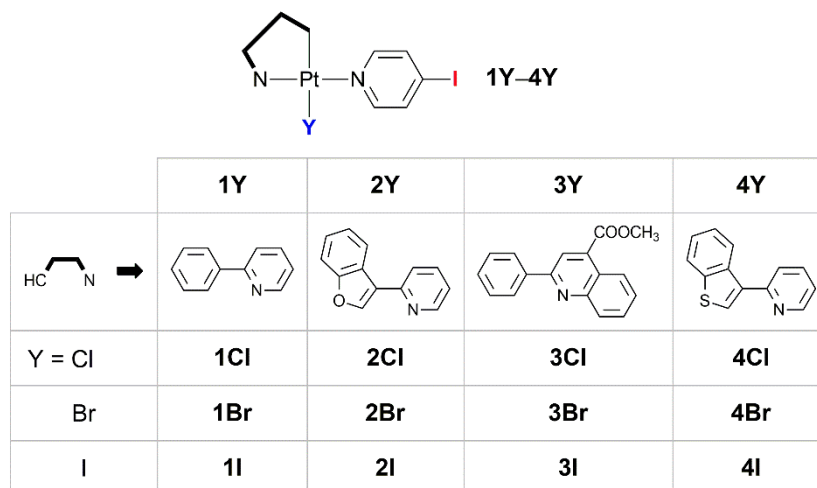

**Scheme S1.** Numeration of Pt(II) complexes **1Y–4Y** (Y = Cl, Br, I).

### X-Ray structure determination

The crystal structures of **1Cl**, **1I**, **2Cl**, **2Br**, **3I**, **4Cl** and **4Br** were determined by the means of single crystal X-ray diffraction analysis. Crystals were fixed on a micro mounts and the diffraction data have been collected on the Rigaku Oxford Diffraction diffractometers at a temperature of 100K. The molecular structures of **1Br** and **3Cl** in the crystal were determined by means of single-crystal X-ray diffraction using Bruker APEX-II CCD for the data collection at a temperature of  $T = 150$  K and  $T = 296$  K respectively. Crystals of **1Cl**, **1I**, **2Cl**, **2Br**, **3I**, **4Cl** were placed on the Xcalibur, Eos diffractometer and measured using monochromated MoK $\alpha$  radiation. Crystals of **1Br** and **3Cl** were placed on the Bruker APEX-II CCD diffractometer and measured using monochromated MoK $\alpha$  radiation. Crystal of **4Br** was placed on the XtaLAB Synergy, HyPix diffractometer and measured using monochromated CuK $\alpha$  radiation. Data were integrated and corrected for background, Lorentz, and polarization effects. An empirical absorption correction based on spherical harmonics implemented in the SCALE3 ABSPACK algorithm was applied in CrysAlisPro<sup>1</sup> or SADABS<sup>2</sup> programs. The unit-cell parameters (Tables S1 and S2) were refined by the least-squares techniques. The structures were solved by dual-space algorithm and refined using the SHELX programs<sup>3,4</sup> incorporated in the OLEX2 program package.<sup>5</sup> The final models included coordinates and anisotropic displacement parameters for all non-H atoms. The carbon-bound H atoms were placed in calculated positions and were included in the refinement in the ‘riding’ model approximation, Uiso(H) set to 1.5Ueq(C) and C–H 0.96 Å for the CH<sub>3</sub> groups, Uiso(H) set to 1.2Ueq(C) and C–H 0.97 Å for the CH<sub>2</sub> groups, Uiso(H) set to 1.2Ueq(C) and C–H 0.93 Å for the CH groups. Supplementary crystallographic data for this paper have been deposited at Cambridge Crystallographic Data Centre (CCDC 2254744–2254747, 2254749, 2254751, 2254752, 2254791, 2256851) and can be obtained free of charge *via* [www.ccdc.cam.ac.uk/structures/](http://www.ccdc.cam.ac.uk/structures/).

**Table S1.** Crystallographic data for compounds **1Cl**, **1Br**, **2Br**, **3I** and **4Cl**.

| Compound                                                | 1Cl                                                  | 1Br                                                  | 2Br                                                   | 3I                                                                              | 4Cl                                                   |
|---------------------------------------------------------|------------------------------------------------------|------------------------------------------------------|-------------------------------------------------------|---------------------------------------------------------------------------------|-------------------------------------------------------|
| Formula                                                 | C <sub>16</sub> H <sub>12</sub> ClIN <sub>2</sub> Pt | C <sub>16</sub> H <sub>12</sub> BrIN <sub>2</sub> Pt | C <sub>18</sub> H <sub>12</sub> BrIN <sub>2</sub> OPt | C <sub>22</sub> H <sub>16</sub> I <sub>2</sub> N <sub>2</sub> O <sub>2</sub> Pt | C <sub>18</sub> H <sub>12</sub> ClIN <sub>2</sub> PtS |
| Crystal system                                          | monoclinic                                           | orthorhombic                                         | monoclinic                                            | monoclinic                                                                      | orthorhombic                                          |
| a (Å)                                                   | 11.6368(5)                                           | 20.7756(17)                                          | 7.34450(10)                                           | 13.6171(4)                                                                      | 16.2664(3)                                            |
| b (Å)                                                   | 15.3999(12)                                          | 23.3714(19)                                          | 11.2531(2)                                            | 12.2009(3)                                                                      | 9.3324(2)                                             |
| c (Å)                                                   | 8.9903(7)                                            | 10.0722(8)                                           | 21.0064(4)                                            | 13.7764(4)                                                                      | 23.3511(5)                                            |
| α (°)                                                   | 90                                                   | 90                                                   | 90                                                    | 90                                                                              | 90                                                    |
| β (°)                                                   | 94.531(5)                                            | 90                                                   | 98.666(2)                                             | 106.076(3)                                                                      | 90                                                    |
| γ (°)                                                   | 90                                                   | 90                                                   | 90                                                    | 90                                                                              | 90                                                    |
| V (Å <sup>3</sup> )                                     | 1606.08(19)                                          | 4890.6(7)                                            | 1716.32(5)                                            | 2199.30(11)                                                                     | 3544.80(13)                                           |
| Molecular weight                                        | 589.72                                               | 634.18                                               | 674.20                                                | 789.26                                                                          | 645.80                                                |
| Space group                                             | P2 <sub>1</sub> /c (14)                              | Pnma (62)                                            | P2 <sub>1</sub> /n (14)                               | P2 <sub>1</sub> /c (14)                                                         | Pbca (61)                                             |
| μ (mm <sup>-1</sup> )                                   | 10.819                                               | 12.946                                               | 12.309                                                | 9.208                                                                           | 9.929                                                 |
| Temperature (K)                                         | 100(2)                                               | 150(2)                                               | 100(2)                                                | 100(2)                                                                          | 100(2)                                                |
| Z                                                       | 4                                                    | 12                                                   | 4                                                     | 4                                                                               | 8                                                     |
| D <sub>calc</sub> (g/cm <sup>3</sup> )                  | 2.439                                                | 2.584                                                | 2.609                                                 | 2.384                                                                           | 2.420                                                 |
| Crystal size (mm <sup>3</sup> )                         | 0.3 × 0.2 × 0.03                                     | 0.3 × 0.2 × 0.2                                      | 0.05 × 0.04 × 0.02                                    | 0.2 × 0.14 × 0.06                                                               | 0.2 × 0.15 × 0.05                                     |
| Diffractometer                                          | Xcalibur, Eos                                        | Bruker APEX-II CCD                                   | Xcalibur, Eos                                         | Xcalibur, Eos                                                                   | Xcalibur, Eos                                         |
| Radiation                                               | MoKα                                                 | MoKα                                                 | MoKα                                                  | MoKα                                                                            | MoKα                                                  |
| Total reflection                                        | 7429                                                 | 23265                                                | 7707                                                  | 14802                                                                           | 38676                                                 |
| Unique reflection                                       | 3146                                                 | 4860                                                 | 3354                                                  | 4320                                                                            | 3470                                                  |
| Angle range 2θ (°)                                      | 6.12 to 51.99                                        | 6.63 to 51.99                                        | 5.66 to 51.98                                         | 6.08 to 51.99                                                                   | 5.33 to 51.996                                        |
| Reflections with<br> F <sub>o</sub>   ≥ 4σ <sub>F</sub> | 2818                                                 | 4683                                                 | 3014                                                  | 3971                                                                            | 3279                                                  |
| R <sub>int</sub>                                        | 0.0282                                               | 0.0283                                               | 0.0213                                                | 0.0301                                                                          | 0.0368                                                |

|                                                 |            |            |            |            |            |
|-------------------------------------------------|------------|------------|------------|------------|------------|
| $R_{\sigma}$                                    | 0.0380     | 0.0229     | 0.0286     | 0.0281     | 0.0153     |
| $R_1$ ( $ F_o  \geq 4\sigma_F$ )                | 0.0281     | 0.0271     | 0.0212     | 0.0198     | 0.0173     |
| wR2 ( $ F_o  \geq 4\sigma_F$ )                  | 0.0547     | 0.0557     | 0.0434     | 0.0453     | 0.0372     |
| R1 (all data)                                   | 0.0338     | 0.0286     | 0.0258     | 0.0232     | 0.0193     |
| wR2 (all data)                                  | 0.0574     | 0.0562     | 0.0450     | 0.0467     | 0.0379     |
| S                                               | 1.042      | 1.210      | 1.064      | 1.063      | 1.148      |
| $\rho_{\max}, \rho_{\min}$ ( $e/\text{\AA}^3$ ) | 1.21/−1.80 | 1.50/−1.26 | 0.74/−0.81 | 0.92/−0.60 | 0.93/−0.41 |
| CCDC                                            | 2254745    | 2254744    | 2254746    | 2254747    | 2254749    |

$R_1 = \Sigma|F_o| - |F_c|/\Sigma|F_o|$ ;  $wR_2 = \{\Sigma[w(F_o^2 - F_c^2)^2]/\Sigma[w(F_o^2)^2]\}^{1/2}$ ;  $w = 1/[\sigma^2(F_o^2) + (aP)^2 + bP]$ , where  $P = (F_o^2 + 2F_c^2)/3$ ;  $s = \{\Sigma[w(F_o^2 - F_c^2)]/(n - p)\}^{1/2}$  where  $n$  is the number of reflections and  $p$  is the number of refinement parameters.

**Table S2.** Crystallographic data for compounds **1I**, **2Cl**, **3Cl** and **4Br**.

| Compound                   | <b>1I</b>              | <b>2Cl</b>              | <b>3Cl</b>                | <b>4Br</b>              |
|----------------------------|------------------------|-------------------------|---------------------------|-------------------------|
| Formula                    | $C_{16}H_{12}I_2N_2Pt$ | $C_{18}H_{12}ClIN_2OPt$ | $C_{22}H_{16}ClIN_2O_2Pt$ | $C_{18}H_{12}BrIN_2PtS$ |
| Crystal system             | orthorhombic           | monoclinic              | triclinic                 | orthorhombic            |
| a ( $\text{\AA}$ )         | 10.2865(2)             | 20.9097(8)              | 9.2830(6)                 | 23.48680(10)            |
| b ( $\text{\AA}$ )         | 23.5155(7)             | 11.5922(3)              | 12.6518(8)                | 18.57310(10)            |
| c ( $\text{\AA}$ )         | 20.9909(4)             | 31.8136(9)              | 21.0436(15)               | 16.48480(10)            |
| $\alpha$ ( $^\circ$ )      | 90                     | 90                      | 90                        | 90                      |
| $\beta$ ( $^\circ$ )       | 90                     | 107.886(4)              | 90                        | 90                      |
| $\gamma$ ( $^\circ$ )      | 90                     | 90                      | 99.172(3)                 | 90                      |
| V ( $\text{\AA}^3$ )       | 5077.5(2)              | 7338.6(4)               | 2439.9(3)                 | 7191.04(7)              |
| Molecular weight           | 681.17                 | 629.74                  | 697.81                    | 690.26                  |
| Space group                | Pcmn (62)              | P2/c (13)               | P-1 (2)                   | Pna2 <sub>1</sub> (33)  |
| $\mu$ ( $\text{mm}^{-1}$ ) | 11.933                 | 9.483                   | 7.144                     | 31.782                  |
| Temperature (K)            | 100(2)                 | 100(2)                  | 297(2)                    | 100(2)                  |
| Z                          | 12                     | 16                      | 4                         | 16                      |



|                                                                 |                    |                    |                    |                       |
|-----------------------------------------------------------------|--------------------|--------------------|--------------------|-----------------------|
| D <sub>calc</sub> (g/cm <sup>3</sup> )                          | 2.673              | 2.280              | 1.900              | 2.550                 |
| Crystal size (mm <sup>3</sup> )                                 | 0.18 × 0.12 × 0.09 | 0.33 × 0.20 × 0.13 | 0.78 × 0.56 × 0.35 | 0.24 × 0.2 × 0.08     |
| Diffractometer                                                  | Xcalibur, Eos      | Xcalibur, Eos      | Bruker APEX-II CCD | XtaLAB Synergy, HyPix |
| Radiation                                                       | MoK $\alpha$       | MoK $\alpha$       | MoK $\alpha$       | CuK $\alpha$          |
| Total reflection                                                | 132557             | 36261              | 16511              | 128082                |
| Unique reflection                                               | 7533               | 14235              | 5166               | 12891                 |
| Angle range 2 $\theta$ (°)                                      | 5.20 to 59.996     | 5.14 to 52.00      | 4.85 to 55.00      | 6.07 to 134.98        |
| Reflections with<br> F <sub>o</sub>   ≥ 4 $\sigma$ <sub>F</sub> | 7331               | 12252              | 4327               | 12810                 |
| R <sub>int</sub>                                                | 0.0507             | 0.0454             | 0.0322             | 0.1178                |
| R <sub><math>\sigma</math></sub>                                | 0.0177             | 0.0513             | 0.0428             | 0.0368                |
| R <sub>1</sub> ( F <sub>o</sub>   ≥ 4 $\sigma$ <sub>F</sub> )   | 0.0740             | 0.0797             | 0.0524             | 0.0781                |
| wR2 ( F <sub>o</sub>   ≥ 4 $\sigma$ <sub>F</sub> )              | 0.1674             | 0.1893             | 0.1386             | 0.1730                |
| R1 (all data)                                                   | 0.0753             | 0.0906             | 0.0612             | 0.0783                |
| wR2 (all data)                                                  | 0.1680             | 0.1968             | 0.1447             | 0.1731                |
| S                                                               | 1.399              | 1.098              | 1.013              | 1.056                 |
| $\rho_{\max}$ , $\rho_{\min}$ (e/Å <sup>3</sup> )               | 3.26/−4.52         | 13.68/−2.22        | 3.66/−1.20         | 5.57/−7.07            |
| CCDC                                                            | 2256851            | 2254751            | 2254752            | 2254791               |

$R_1 = \Sigma||F_o| - |F_c||/\Sigma|F_o|$ ;  $wR_2 = \{\Sigma[w(F_o^2 - F_c^2)^2]/\Sigma[w(F_o^2)^2]\}^{1/2}$ ;  $w = 1/[\sigma^2(F_o^2) + (aP)^2 + bP]$ , where  $P = (F_o^2 + 2F_c^2)/3$ ;  $s = \{\Sigma[w(F_o^2 - F_c^2)]/(n - p)\}^{1/2}$  where  $n$  is the number of reflections and  $p$  is the number of refinement parameters.

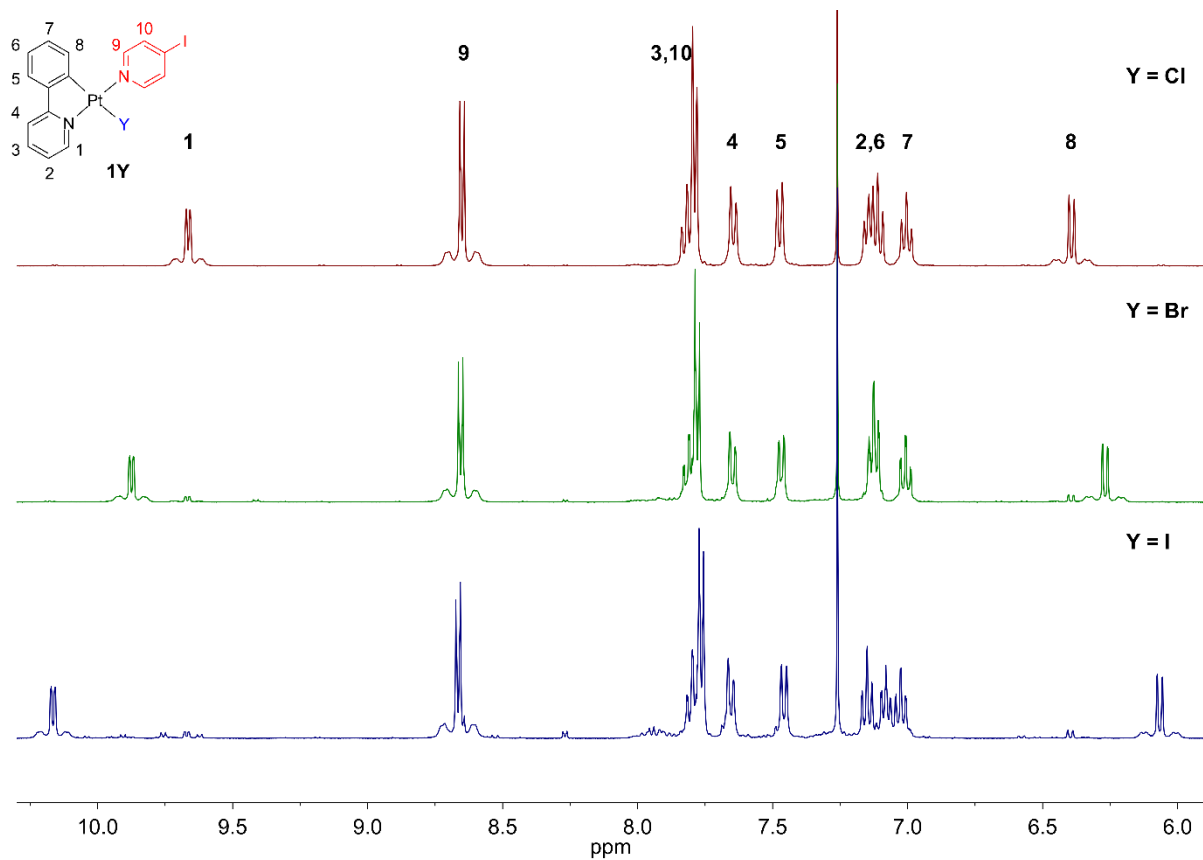

**Figure S1.**  $^1\text{H}$  NMR spectra of complexes **1Y**,  $\text{d}_1$ -chloroform, r.t.

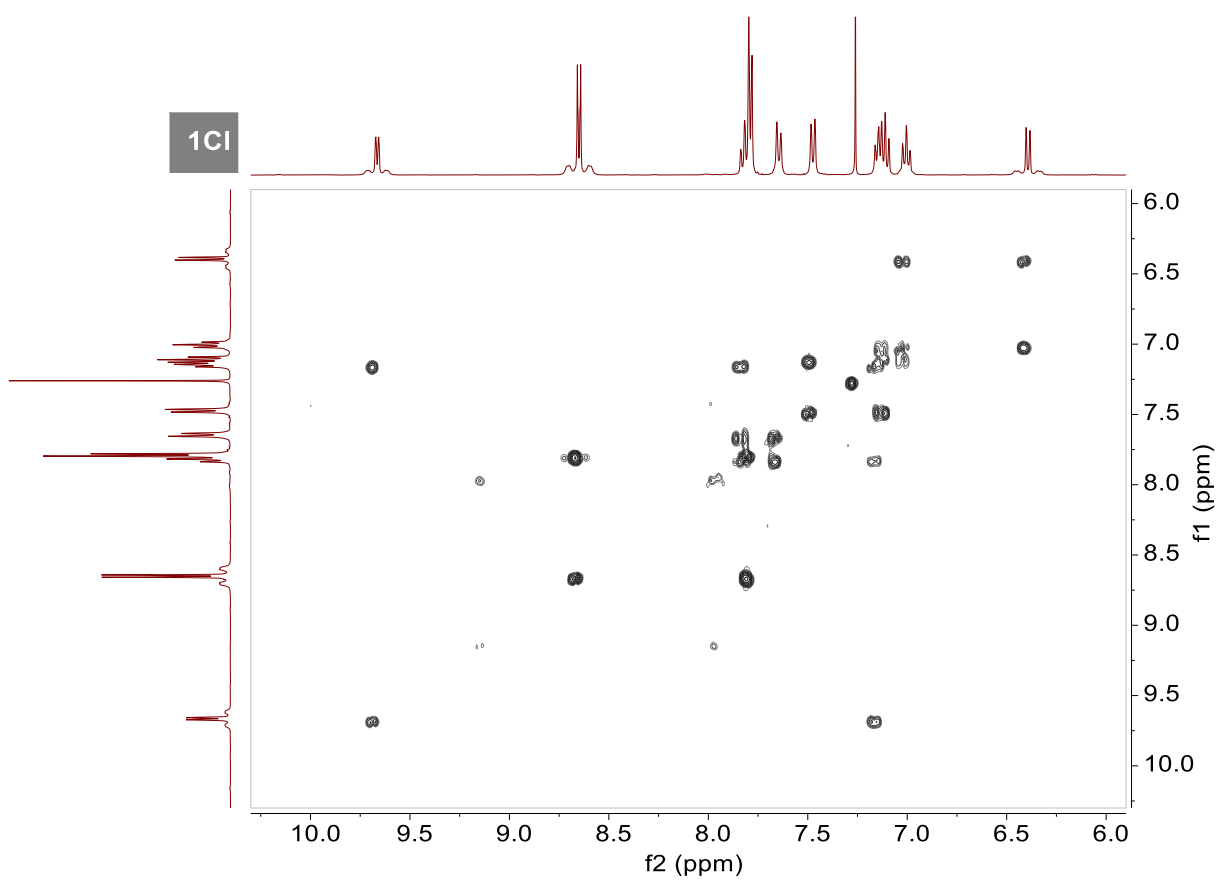

**Figure S2.**  $^1\text{H}$  $^1\text{H}$  COSY NMR spectrum of complex **1Cl**,  $\text{d}_1$ -chloroform, r.t.

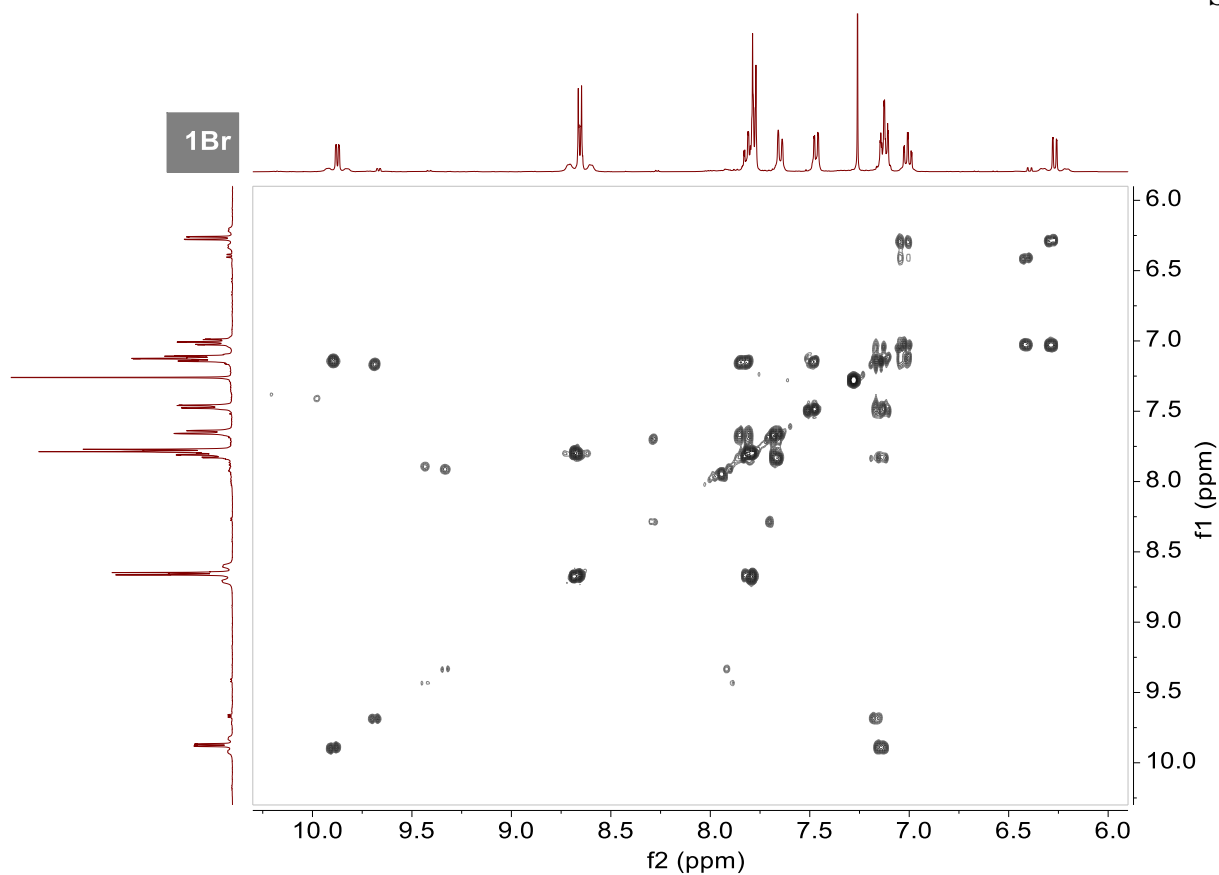

**Figure S3.**  $^1\text{H}$ - $^1\text{H}$  COSY NMR spectrum of complex **1Br**,  $\text{d}_1$ -chloroform, r.t.

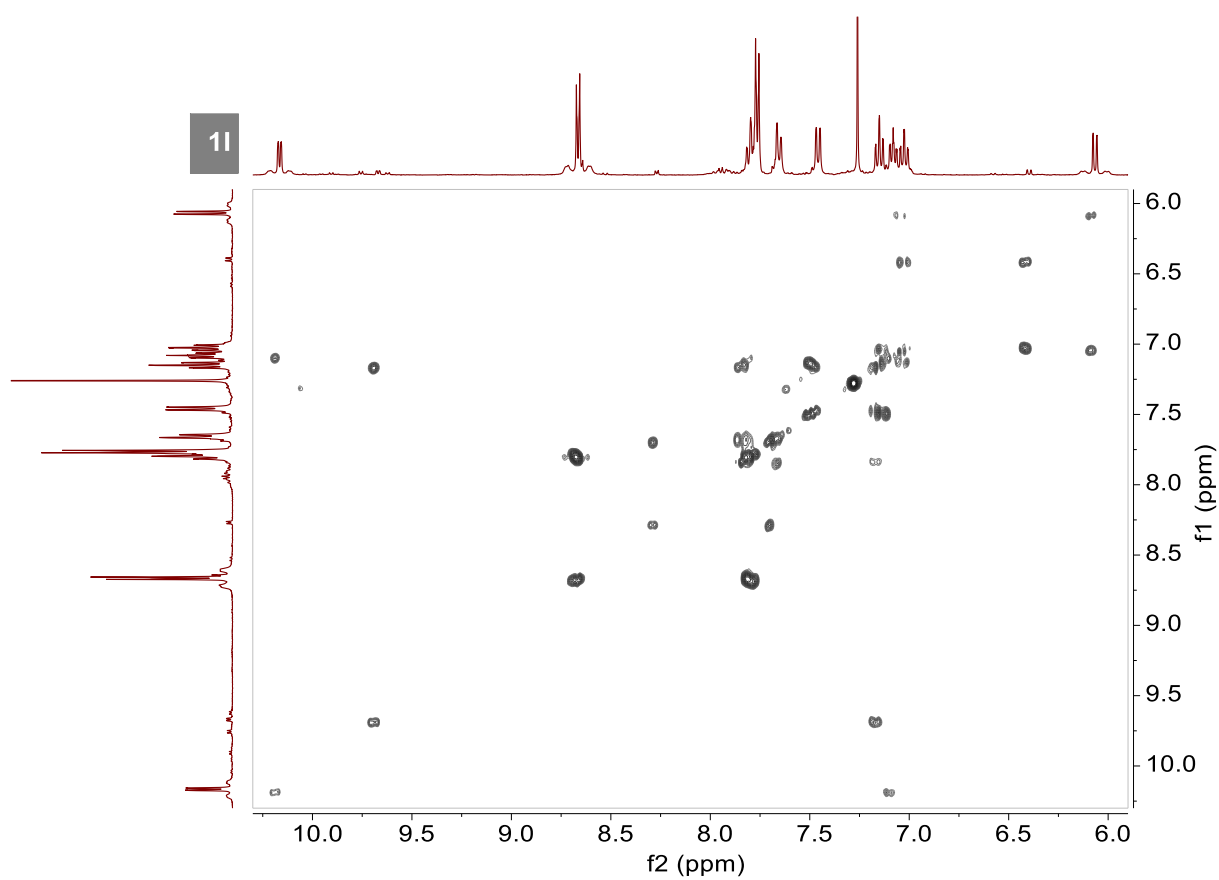

**Figure S4.**  $^1\text{H}$ - $^1\text{H}$  COSY NMR spectrum of complex **1I**,  $\text{d}_1$ -chloroform, r.t.

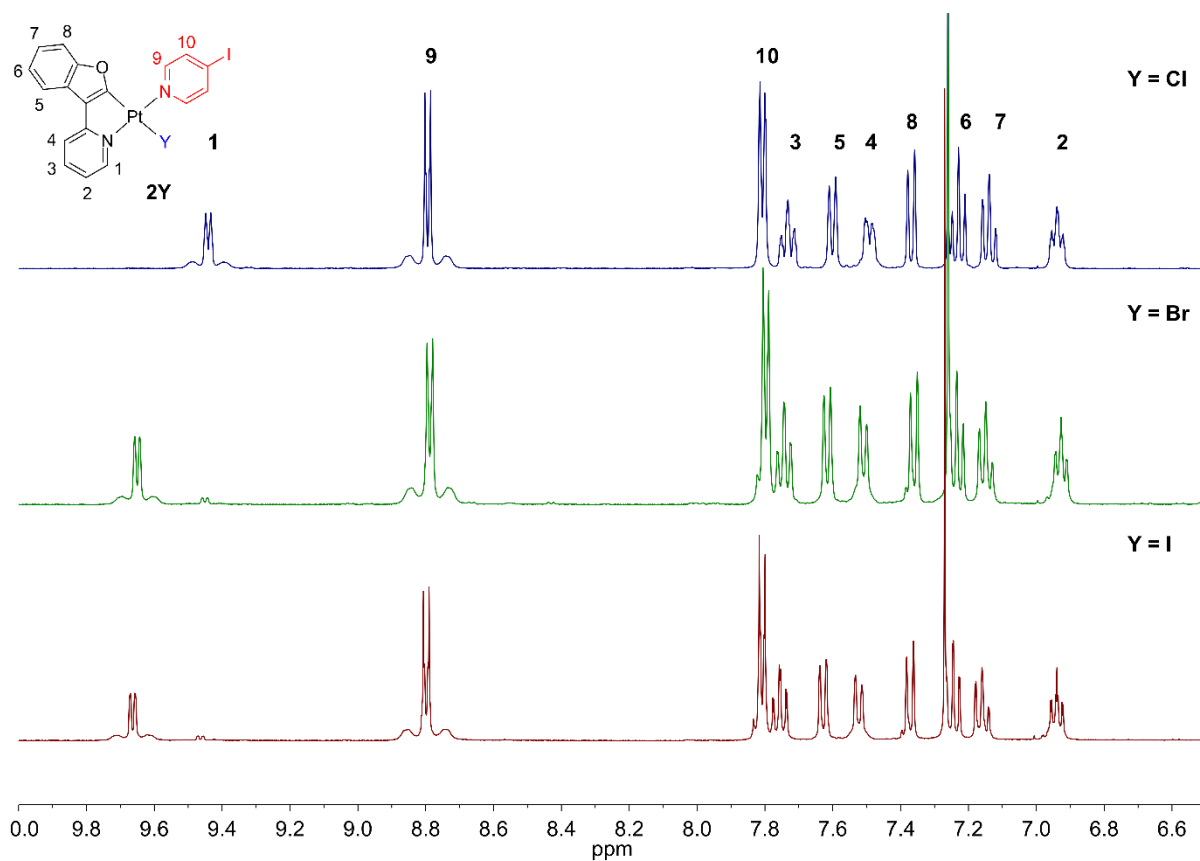

**Figure S5.**  $^1\text{H}$  NMR spectra of complexes **2Y**,  $\text{d}_1$ -chloroform, r.t.

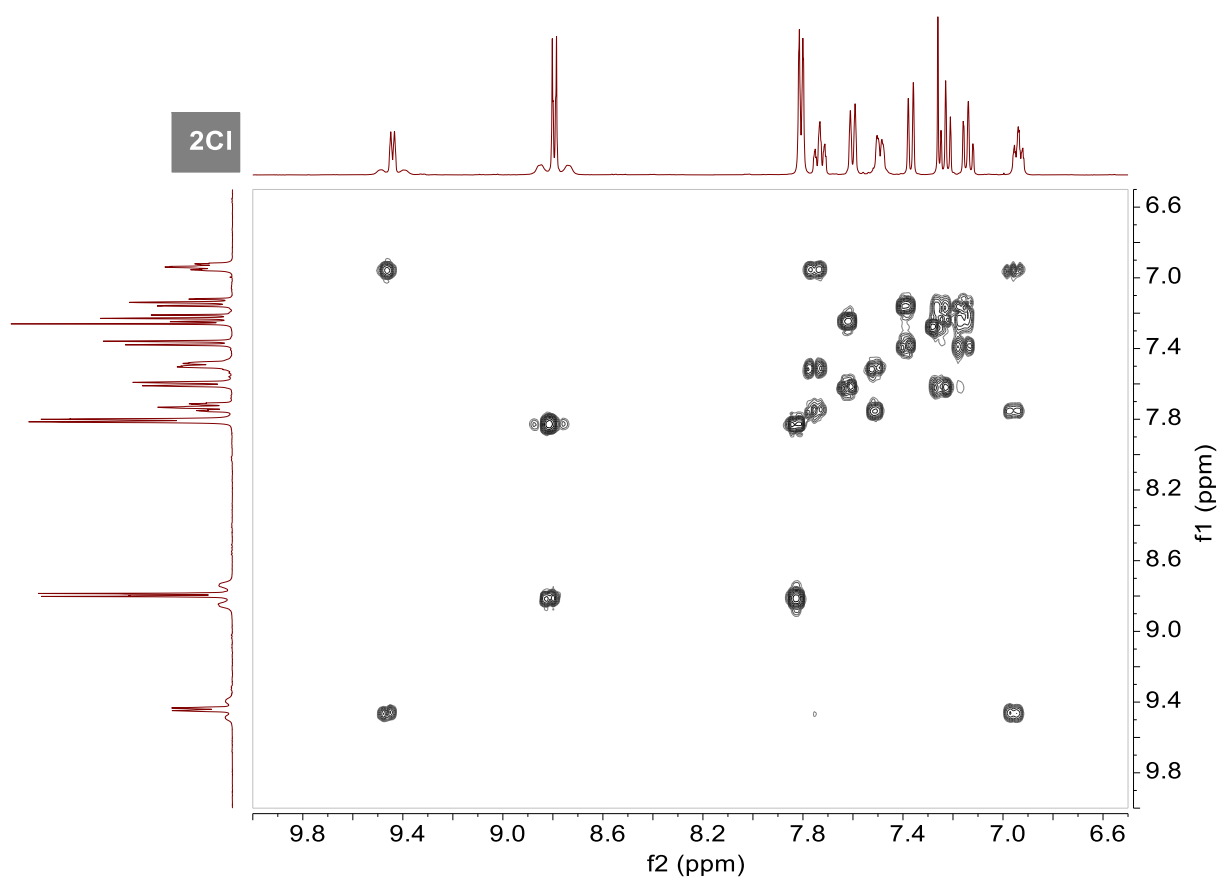

**Figure S6.**  $^1\text{H}$  $^1\text{H}$  COSY NMR spectrum of complex **2Cl**,  $\text{d}_1$ -chloroform, r.t.

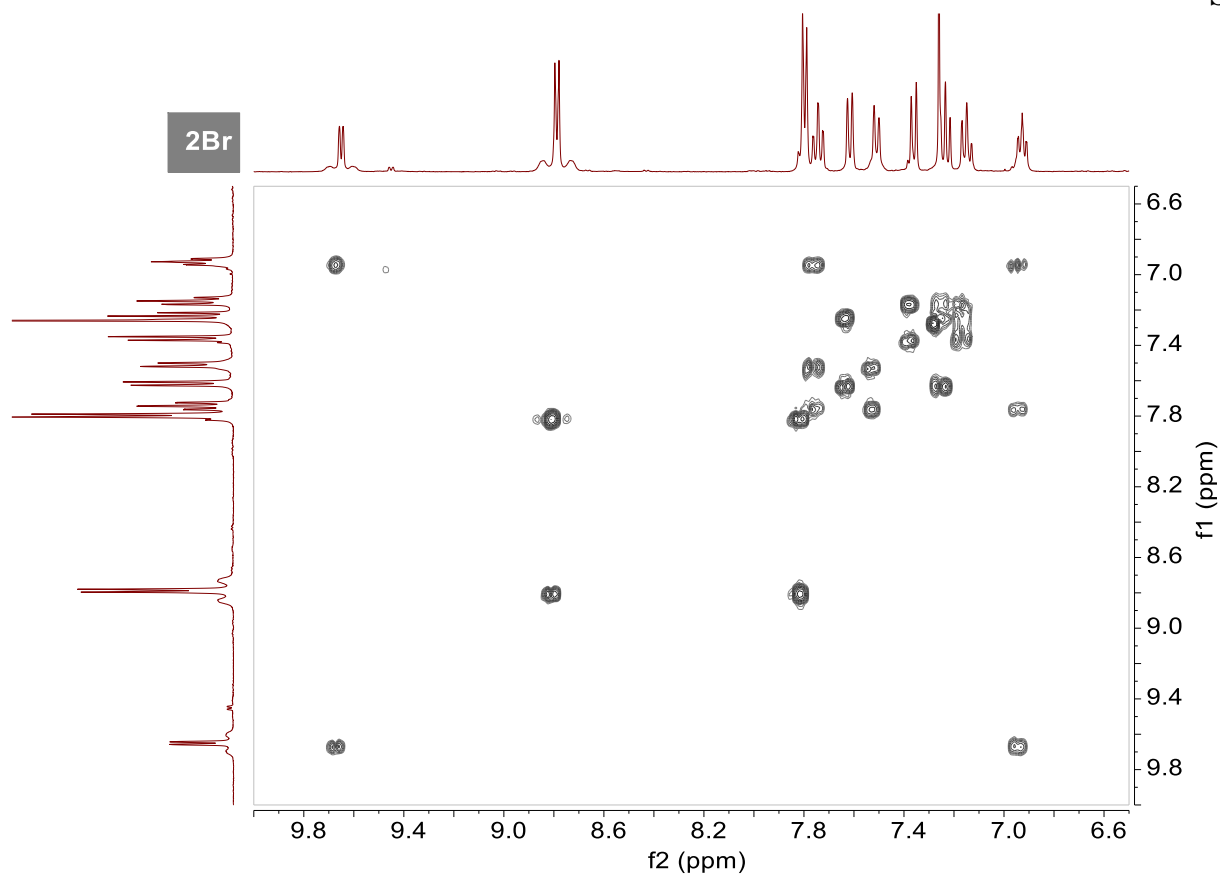

**Figure S7.**  $^1\text{H}$ - $^1\text{H}$  COSY NMR spectrum of complex **2Br**,  $\text{d}_1$ -chloroform, r.t.

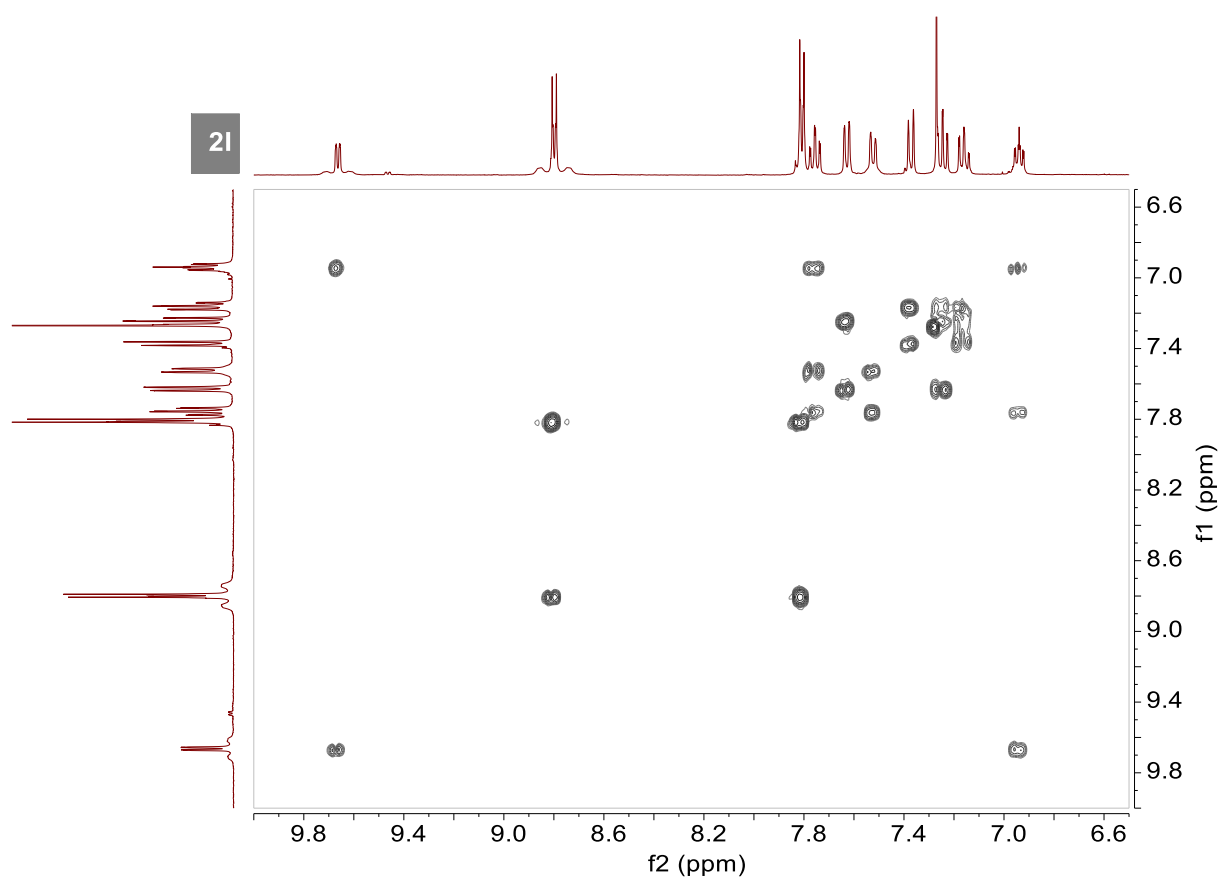

**Figure S8.**  $^1\text{H}$ - $^1\text{H}$  COSY NMR spectrum of complex **2I**,  $\text{d}_1$ -chloroform, r.t.

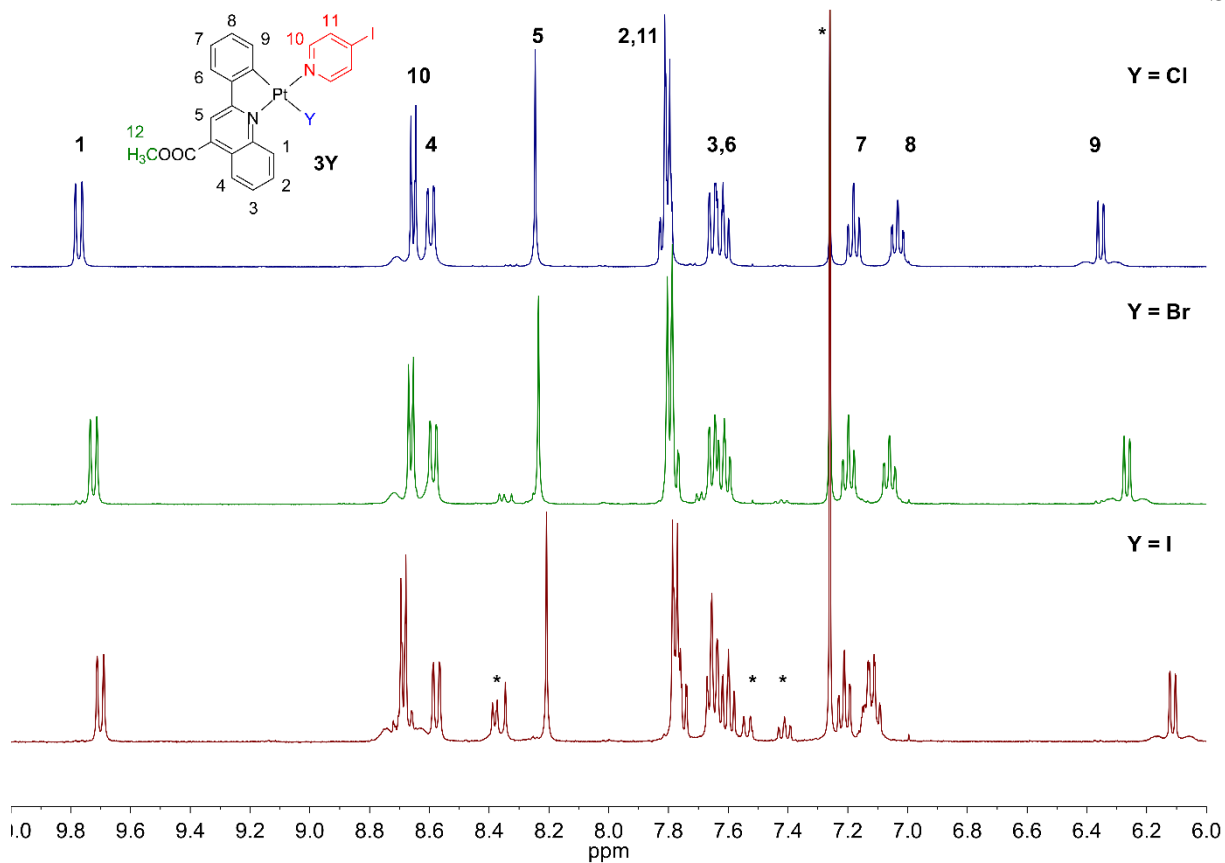

**Figure S9.**  $^1\text{H}$  NMR spectra of complexes **3Y**,  $\text{d}_1$ -chloroform, r.t.

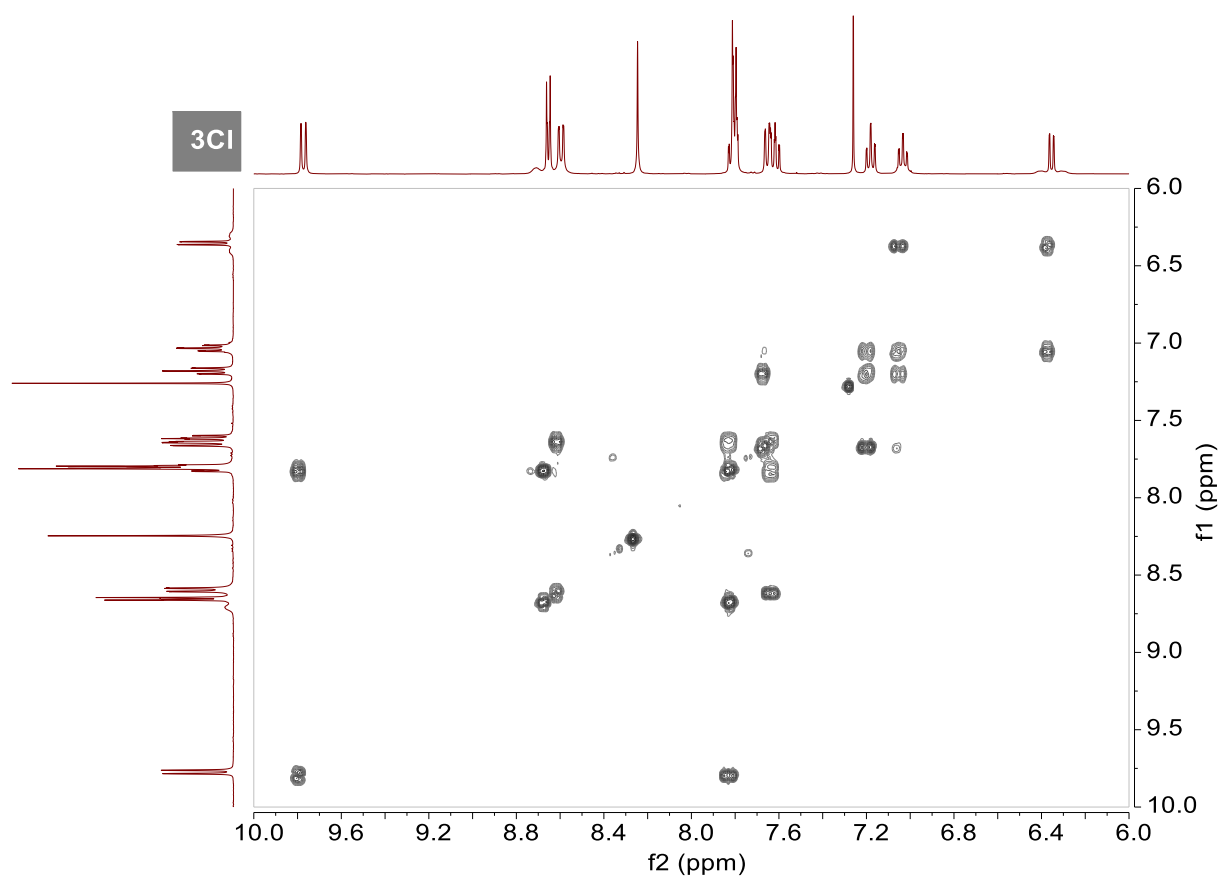

**Figure S10.**  $^1\text{H}$ - $^1\text{H}$  COSY NMR spectrum of complex **3Cl**,  $\text{d}_1$ -chloroform, r.t.

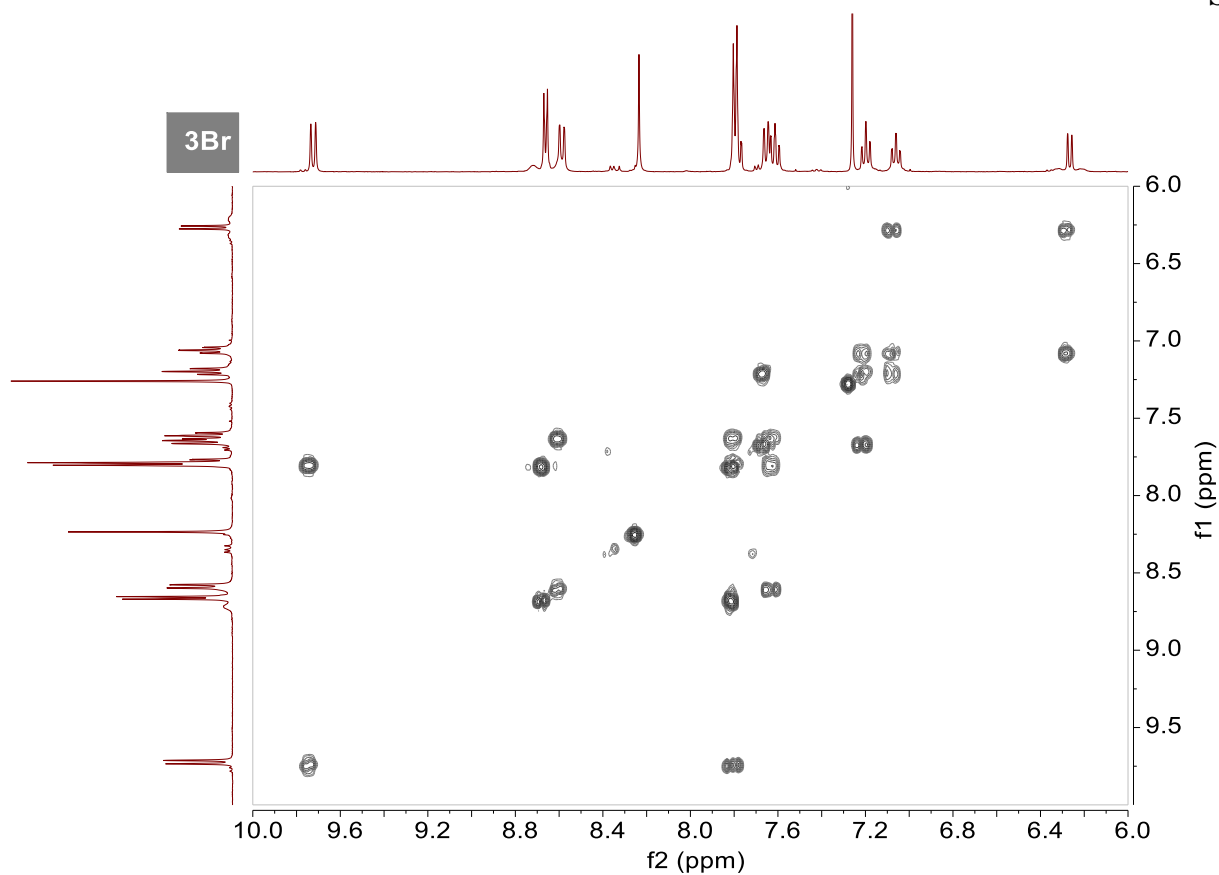

**Figure S11.**  $^1\text{H}$ - $^1\text{H}$  COSY NMR spectrum of complex **3Br**,  $\text{d}_1$ -chloroform, r.t.

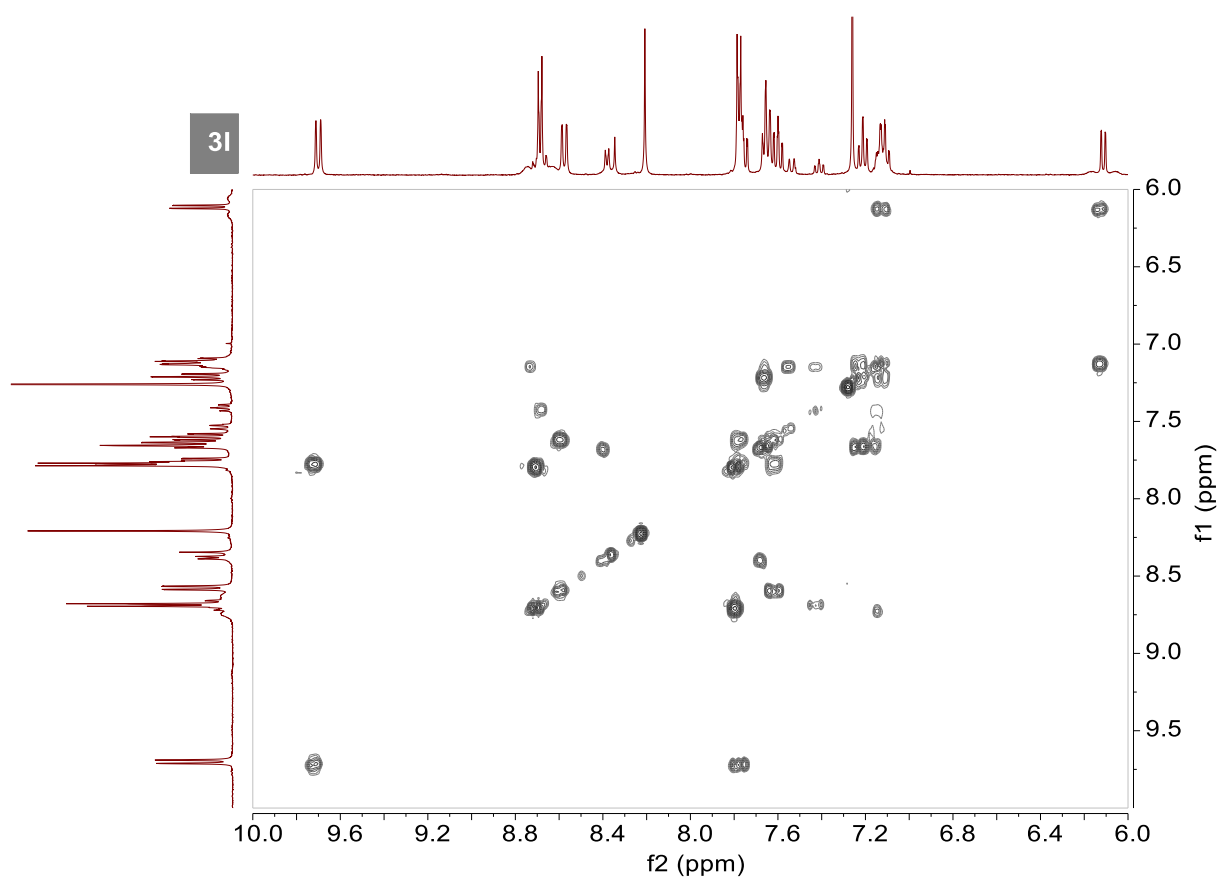

**Figure S12.**  $^1\text{H}$ - $^1\text{H}$  COSY NMR spectrum of complex **3I**,  $\text{d}_1$ -chloroform, r.t.

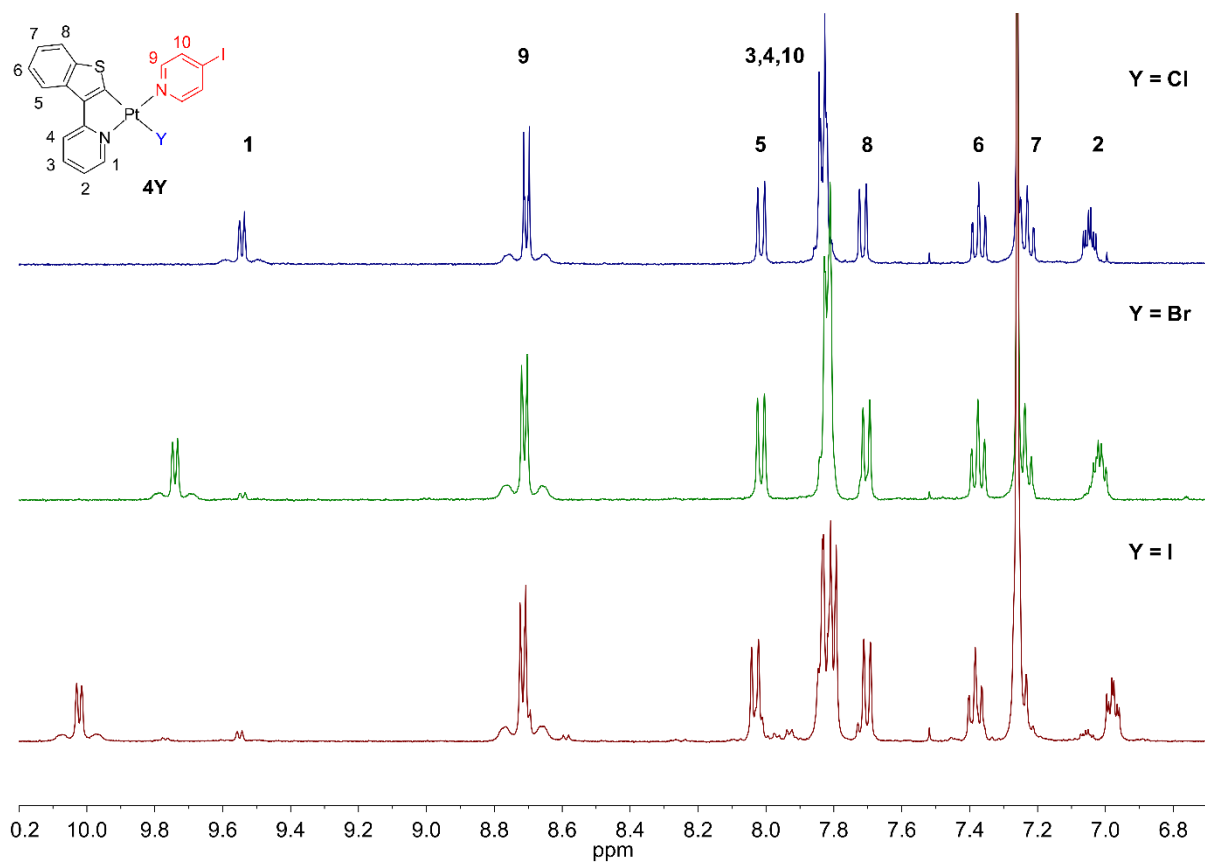

**Figure S13.**  $^1\text{H}$  NMR spectra of complexes **4Y**,  $d_1$ -chloroform, r.t.

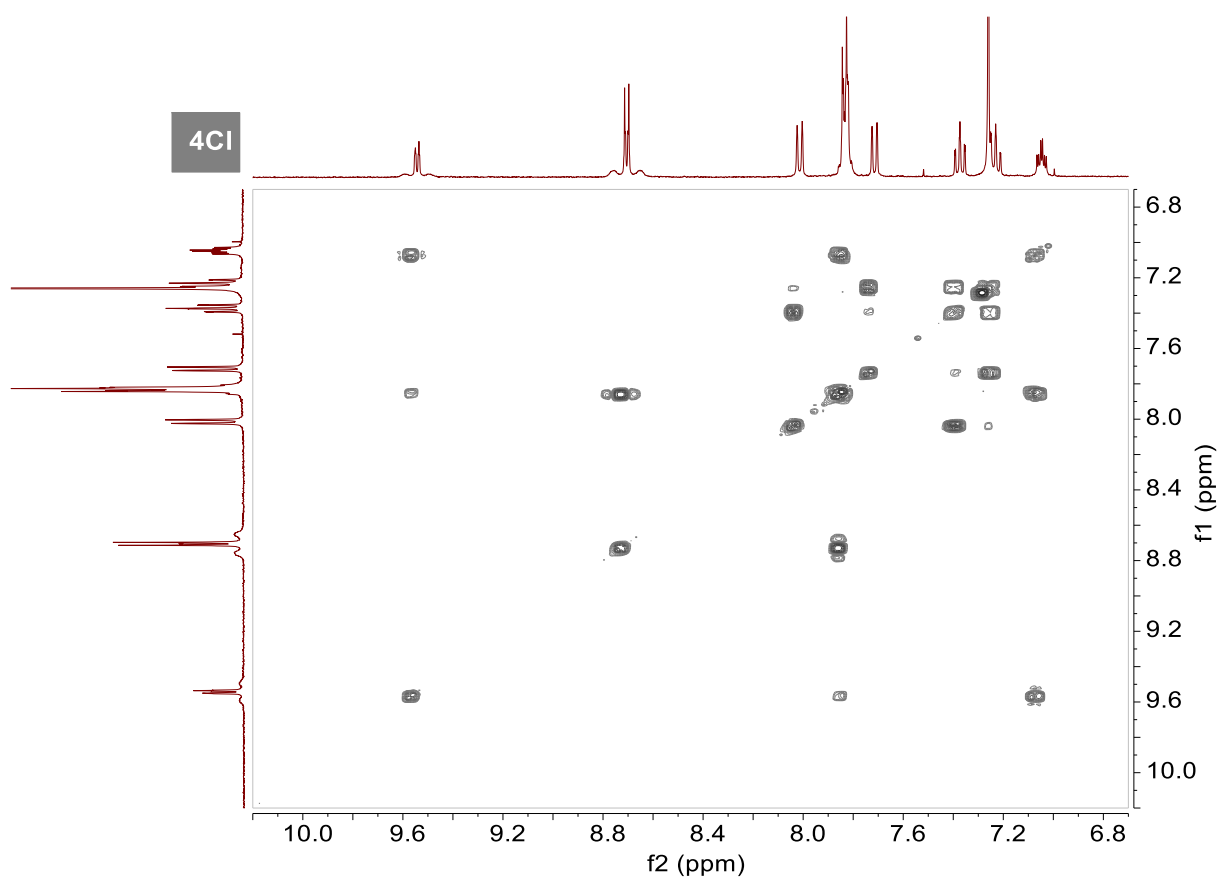

**Figure S14.**  $^1\text{H}$ - $^1\text{H}$  COSY NMR spectrum of complex **4Cl**,  $d_1$ -chloroform, r.t.



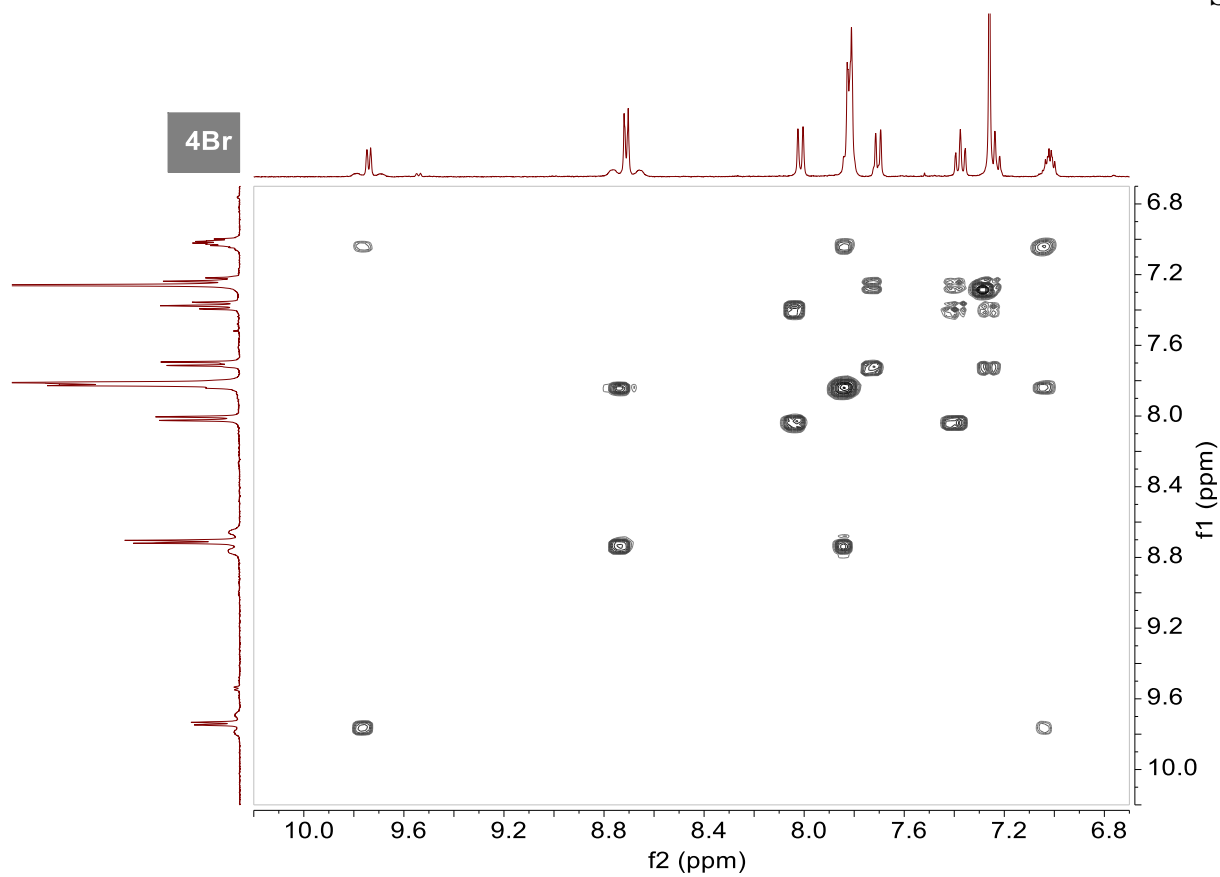

**Figure S15.**  $^1\text{H}$ - $^1\text{H}$  COSY NMR spectrum of complex **4Br**,  $\text{d}_1$ -chloroform, r.t.

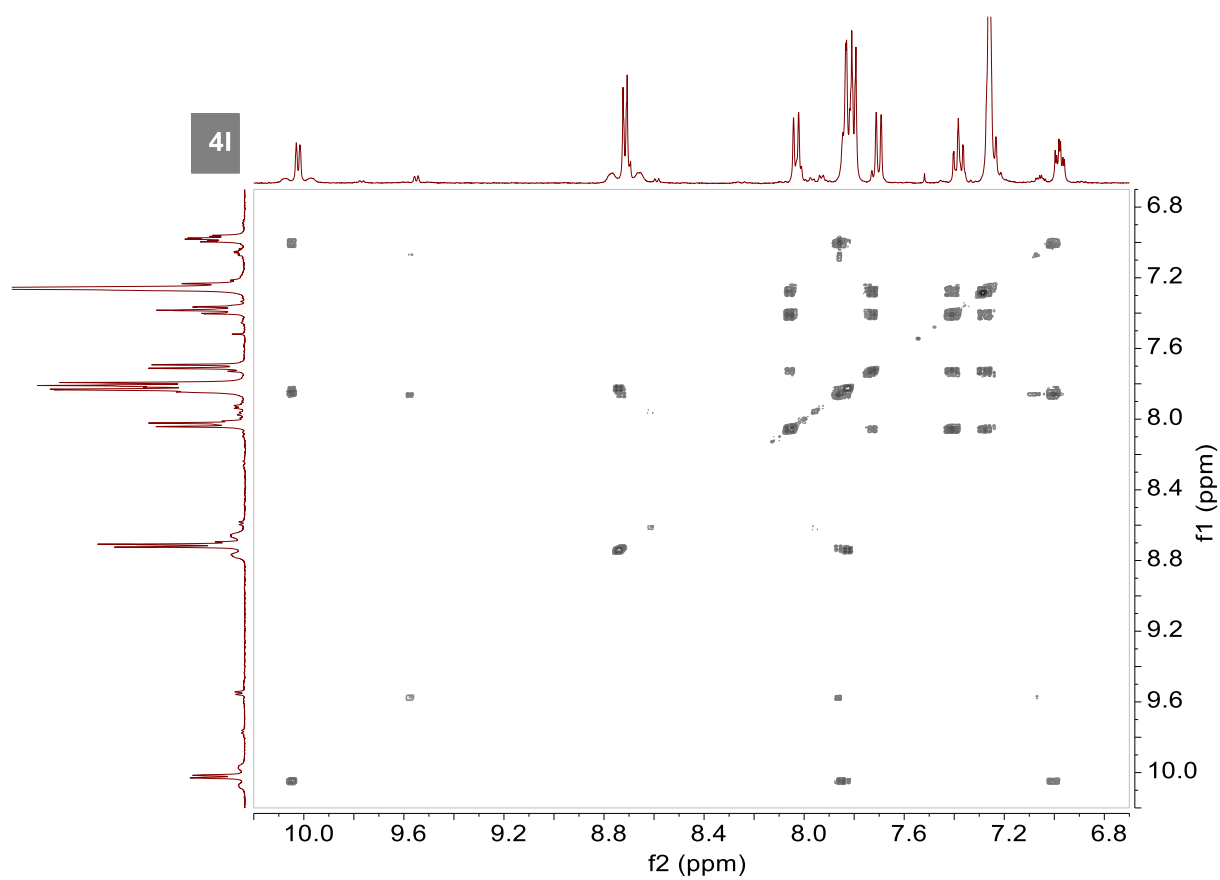

**Figure S16.**  $^1\text{H}$ - $^1\text{H}$  COSY NMR spectrum of complex **4I**,  $\text{d}_1$ -chloroform, r.t.

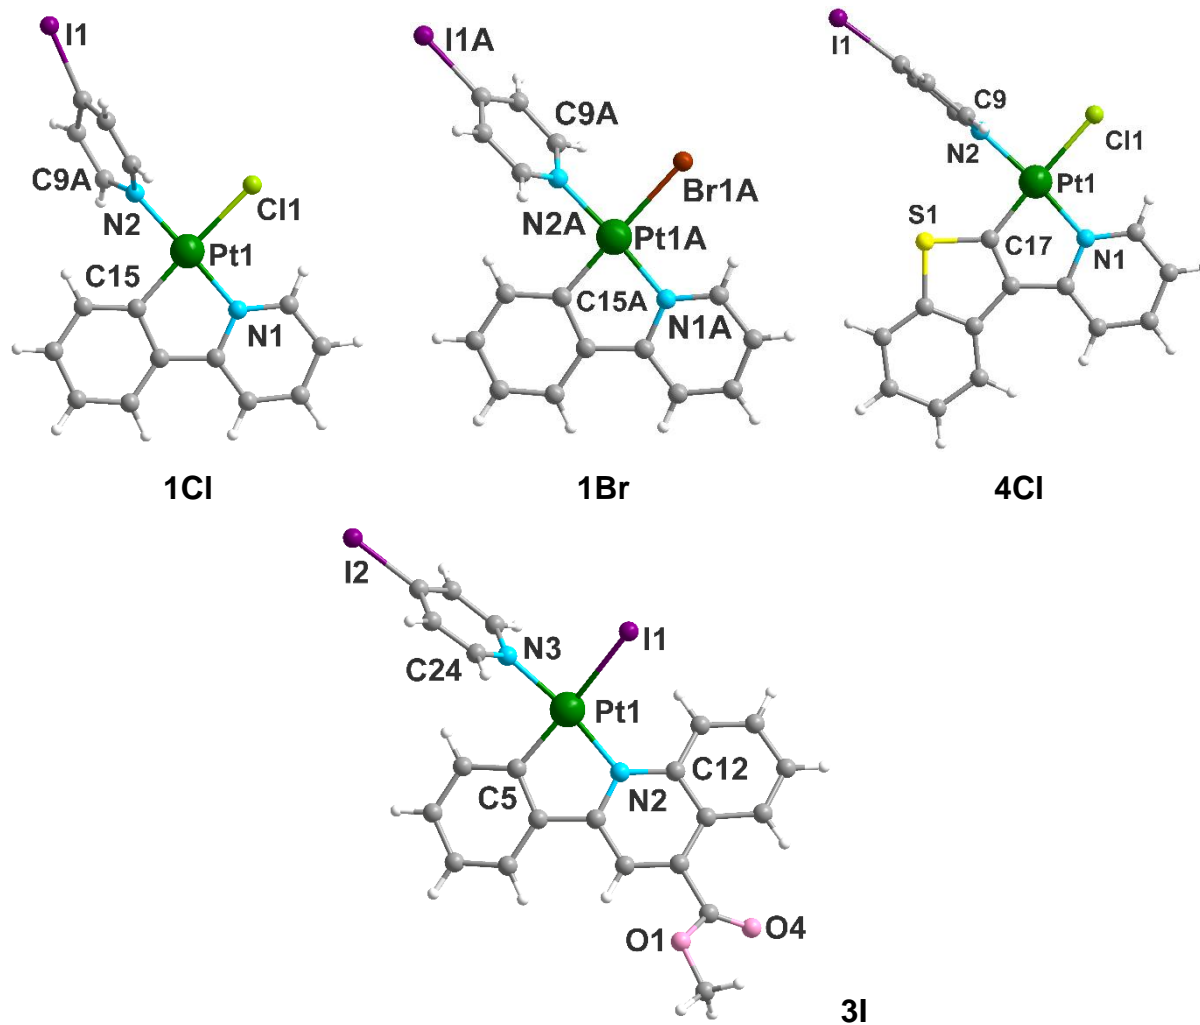

**Figure S17.** Molecular structure of **1Cl**, **1Br**, **3I** and **4Cl**.

**Table S3.** Selected structure parameters of **1Cl**, **1Br**, **2Br**, **3I** and **4Cl**.

|            | Distance, Å |           | Angle, °      |           | Torsion, °        |          |
|------------|-------------|-----------|---------------|-----------|-------------------|----------|
| <b>1Cl</b> | Pt1–N2      | 2.027(5)  | N2–Pt1–C15    | 96.4(2)   | C9A–N2–Pt1–Cl1    | 110.9(7) |
|            | Pt1–N1      | 2.006(5)  | C15–Pt1–N1    | 82.1(2)   |                   |          |
|            | Pt1–C15     | 1.980(6)  | N1–Pt1–Cl1    | 95.1(1)   |                   |          |
|            | Pt1–Cl1     | 2.397(2)  | Cl1–Pt1–N2    | 86.4(1)   |                   |          |
| <b>1Br</b> | Pt1A–N1A    | 2.018(4)  | Br1A–Pt1A–N2A | 86.6(1)   | C9A–N2A–Pt1A–Br1A | 64.6(4)  |
|            | Pt1A–N2A    | 2.015(4)  | N2A–Pt1A–C15A | 94.7(2)   |                   |          |
|            | Pt1A–C15A   | 1.993(6)  | C15A–Pt1A–N1A | 81.1(2)   |                   |          |
|            | Pt1A–Br1A   | 2.5438(6) | N1A–Pt1A–Br1A | 97.5(1)   |                   |          |
| <b>2Br</b> | Pt1–N1      | 2.046(3)  | N1–Pt1–Br1    | 96.46(9)  | C9–N2–Pt1–Br1     | 136.6(3) |
|            | Pt1–N2      | 2.034(3)  | Br1–Pt1–N2    | 89.18(9)  |                   |          |
|            | Pt1–C17     | 1.941(4)  | N2–Pt1–C17    | 95.9(2)   |                   |          |
|            | Pt1–Br1     | 2.5091(5) | C17–Pt1–N1    | 78.5(2)   |                   |          |
| <b>3I</b>  | Pt1–N3      | 2.022(2)  | C5–Pt1–N3     | 91.4(1)   | C24–N3–Pt1–C5     | 77.5(3)  |
|            | Pt1–I1      | 2.7208(4) | N3–Pt1–I1     | 86.00(8)  | C12–N2–Pt1–I1     | –30.0(3) |
|            | Pt1–N2      | 2.051(2)  | I1–Pt1–N2     | 101.44(7) |                   |          |
|            | Pt1–C5      | 1.989(4)  | N2–Pt1–C5     | 80.4(1)   |                   |          |
| <b>4Cl</b> | Pt1–N2      | 2.018(3)  | N2–Pt1–C17    | 94.5(1)   | C9–N2–Pt1–Cl1     | –88.6(2) |
|            | Pt1–N1      | 2.022(3)  | C17–Pt1–N1    | 79.7(1)   |                   |          |
|            | Pt1–C17     | 1.949(4)  | N1–Pt1–Cl1    | 97.20(8)  |                   |          |
|            | Pt1–Cl1     | 2.3738(9) | Cl1–Pt1–N2    | 88.68(8)  |                   |          |

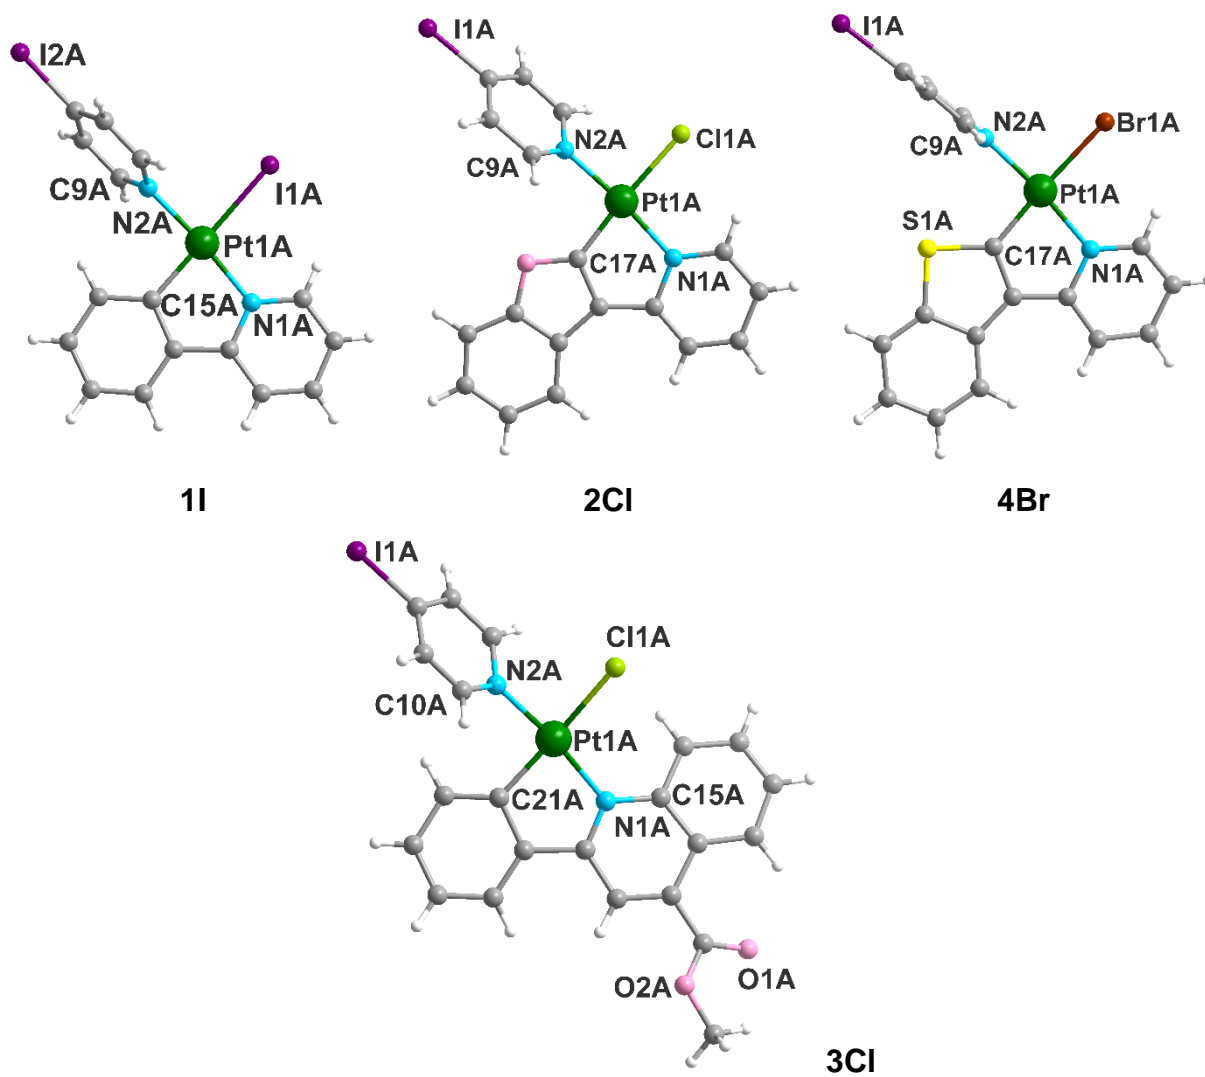

**Figure S18.** Molecular structure of 1I, 2Cl, 3Cl and 4Br.

**Table S4.** Selected structure parameters of **1I**, **2Cl**, **3Cl** and **4Br**.

|            | Distance, Å |          | Angle, °      |          | Torsion, °         |         |
|------------|-------------|----------|---------------|----------|--------------------|---------|
| <b>1I</b>  | I1A–Pt1A    | 2.699(1) | N1A–Pt1A–C15A | 80.9(6)  | C9A–N2A–Pt1A–I1A   | 108(1)  |
|            | Pt1A–N1A    | 2.02(1)  | C15A–Pt1A–N2A | 94.1(5)  |                    |         |
|            | Pt1A–C15A   | 1.99(2)  | N2A–Pt1A–I1A  | 85.5(3)  |                    |         |
|            | Pt1A–N2A    | 2.02(1)  | I1A–Pt1A–N1A  | 99.5(4)  |                    |         |
| <b>2Cl</b> | N2A–Pt1A    | 2.02(1)  | N2A–Pt1A–Cl1A | 89.5(4)  | C9A–N2A–Pt1A–Cl1A  | –124(1) |
|            | Pt1A–Cl1A   | 2.369(5) | Cl1A–Pt1A–N1A | 96.1(5)  |                    |         |
|            | Pt1A–N1A    | 2.03(1)  | N1A–Pt1A–C17A | 79.6(7)  |                    |         |
|            | Pt1A–C17A   | 1.92(2)  | C17A–Pt1A–N2A | 94.8(7)  |                    |         |
| <b>3Cl</b> | Cl1A–Pt1A   | 2.431(3) | Cl1A–Pt1A–N1A | 102.2(3) | C15A–N1A–Pt1A–Cl1A | –25(1)  |
|            | Pt1A–N1A    | 2.03(1)  | N1A–Pt1A–C21A | 81.8(5)  | C10A–N2A–Pt1A–Cl1A | –110(1) |
|            | Pt1A–C21A   | 1.97(1)  | C21A–Pt1A–N2A | 91.6(5)  |                    |         |
|            | Pt1A–N2A    | 1.99(1)  | N2A–Pt1A–Cl1A | 83.5(3)  |                    |         |
| <b>4Br</b> | Br1A–Pt1A   | 2.492(4) | Br1A–Pt1A–N2A | 89.6(7)  | C9A–N2A–Pt1A–Br1A  | –89(2)  |
|            | Pt1A–N1A    | 2.05(3)  | N2A–Pt1A–C17A | 94(1)    |                    |         |
|            | Pt1A–C17A   | 1.93(3)  | C17A–Pt1A–N1A | 80(1)    |                    |         |
|            | Pt1A–N2A    | 2.02(3)  | N1A–Pt1A–Br1A | 97.0(7)  |                    |         |

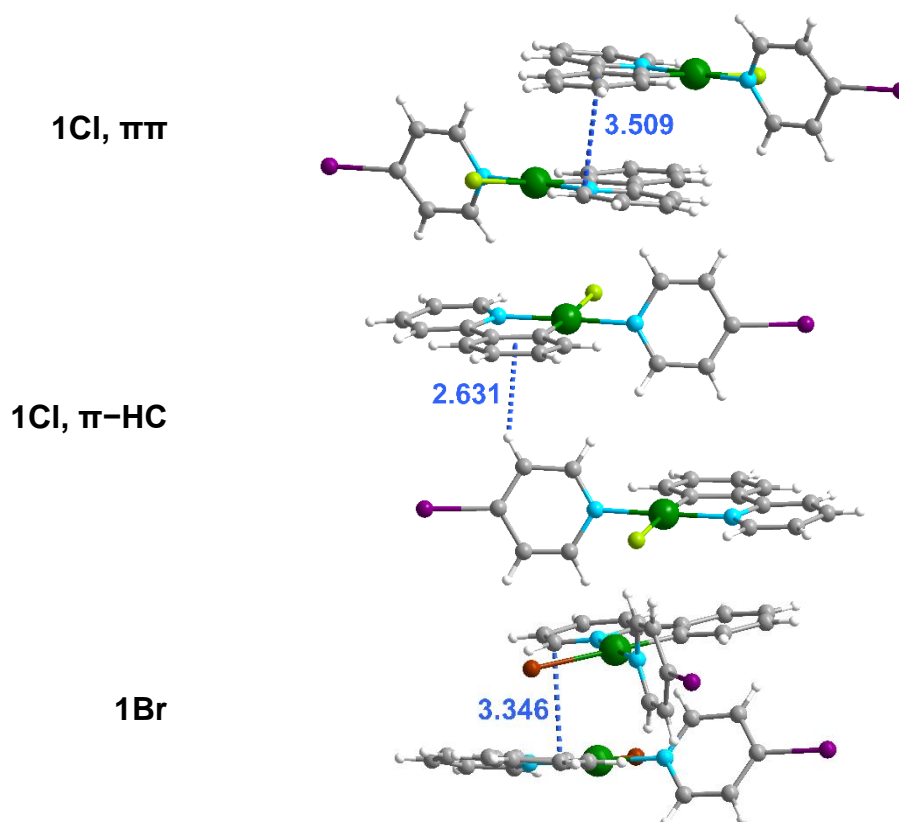**Figure S19.** Fragment of molecular packing of **1Y** (Y = Cl, Br). The intermolecular  $\pi\pi$  distance was measured between the closest atoms, distances are given in Å.

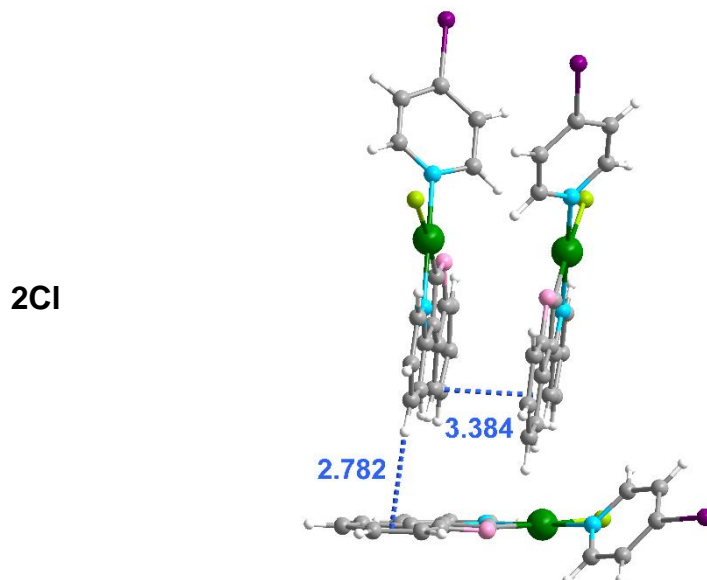

**Figure S20.** Fragment of molecular packing of **2Cl**. The intermolecular  $\pi\pi$  distance was measured between the closest atoms, distances are given in Å.

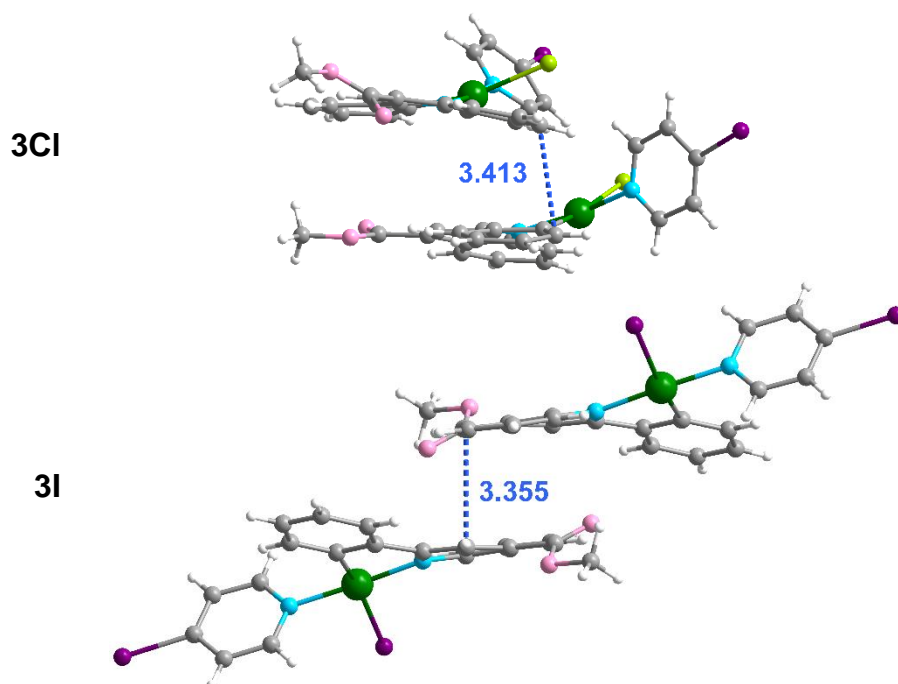

**Figure S21.** Fragment of molecular packing of **3Y** (Y = Cl, I). The intermolecular  $\pi\pi$  distance was measured between the closest atoms, distances are given in Å.

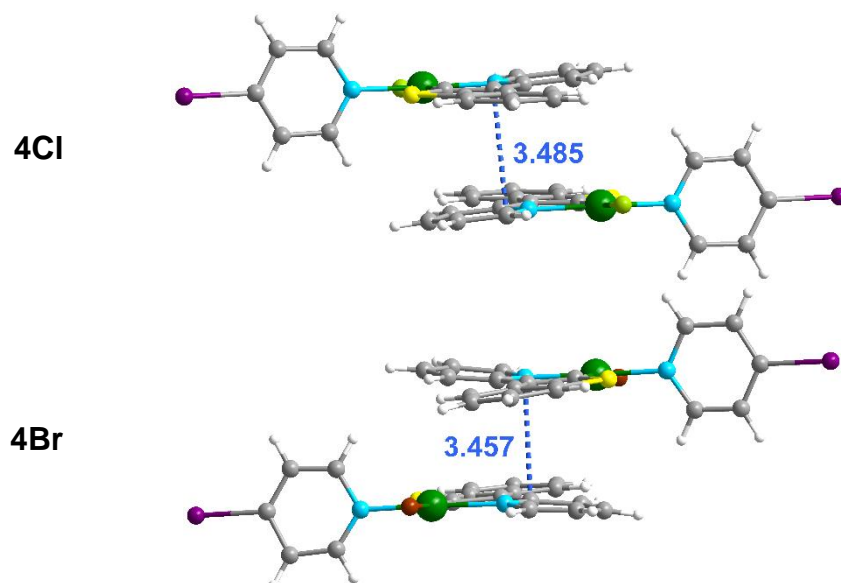

**Figure S22.** Fragment of molecular packing of **4Y** (Y = Cl, Br). The intermolecular  $\pi\pi$  distance was measured between the closest atoms, distances are given in Å.

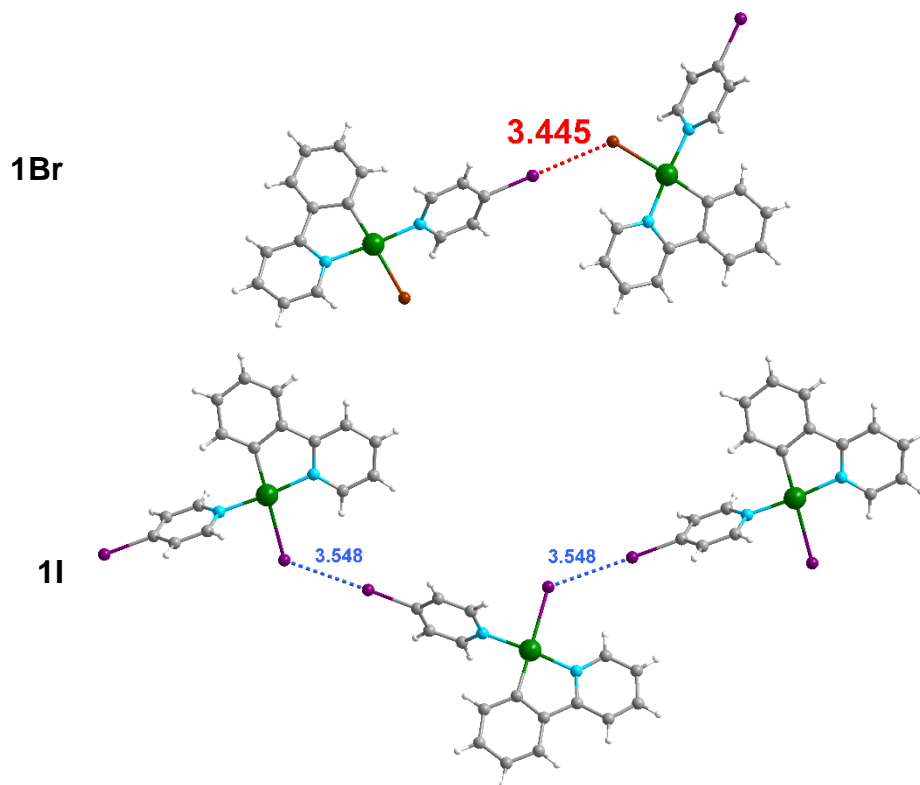

**Figure S23.** Fragments of molecular packing of **1Y** (Y = Br, I) with XB visualization, distances are given in Å.

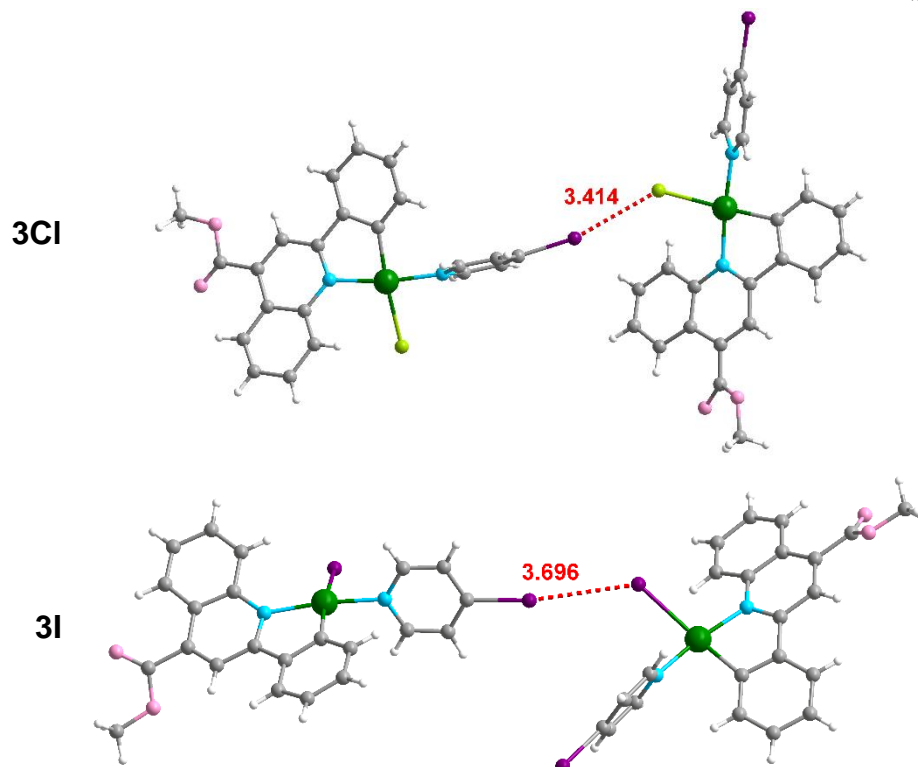

**Figure S24.** Fragments of molecular packing of **3Y** (Y = Cl, I) with XB visualization, distances are given in Å.

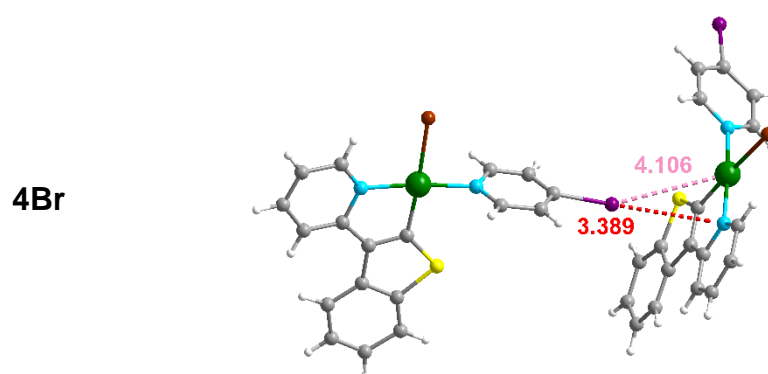

**Figure S25.** Fragments of molecular packing of **4Br** with XB visualization, distances are given in Å.

**Table S5.** Structural parameters of XBs of **1I**, **2Cl**, **3Cl** and **4Br**.

|            | Y                | $d(\text{I}\cdots\text{Y})$ , Å | $R_{\text{IY}}^{*6}$ | $\text{C}-\text{I}\cdots\text{Y}$ , ° | $\text{Pt}-\text{Y}\cdots\text{I}$ , ° |
|------------|------------------|---------------------------------|----------------------|---------------------------------------|----------------------------------------|
| <b>1I</b>  | I                | 3.5476                          | 0.896                | 177.67                                | 122.93                                 |
| <b>2Cl</b> | Cl               | 3.8607                          | 1.035                | 147.91                                | 119.09                                 |
| <b>3Cl</b> | Cl               | 3.4141                          | 0.915                | 167.34                                | 135.11                                 |
| <b>4Br</b> | Ce <sup>**</sup> | 3.389                           | –                    | 171.11                                | –                                      |

\*  $R_{\text{IY}} = d_{\text{I-Y}} / (r_{\text{I}} + r_{\text{Y}})$ ,  $r_{\text{I}}$  and  $r_{\text{Y}}$  are van der Waals radii.<sup>7</sup>

\*\* Ce is centroid of metallocycle {PtNC<sub>3</sub>}.



**Table S6.** Realization of non-covalent interactions in crystal structure of **1Y–4Y**.

|            | $\pi\pi$ | $\pi\cdots\text{H}-\text{C}$ | $\text{C}-\text{I}\cdots\text{Y}$ | $\text{C}-\text{I}\cdots\text{Pt}$ | $\text{C}-\text{I}\cdots\text{Ce}^*$ |
|------------|----------|------------------------------|-----------------------------------|------------------------------------|--------------------------------------|
| <b>1Cl</b> | ■        | ■                            |                                   | ■                                  |                                      |
| <b>1Br</b> | ■        |                              | ■                                 |                                    |                                      |
| <b>1I</b>  |          |                              | ■                                 |                                    |                                      |
| <b>2Cl</b> | ■        | ■                            |                                   |                                    |                                      |
| <b>2Br</b> | ■        |                              | ■                                 |                                    |                                      |
| <b>3Cl</b> | ■        |                              | ■                                 |                                    |                                      |
| <b>3I</b>  | ■        |                              | ■                                 |                                    |                                      |
| <b>4Cl</b> | ■        |                              |                                   |                                    | ■                                    |
| <b>4Br</b> | ■        |                              |                                   |                                    | ■                                    |

\* Ce is centroid of metallocycle {PtNC<sub>3</sub>}.

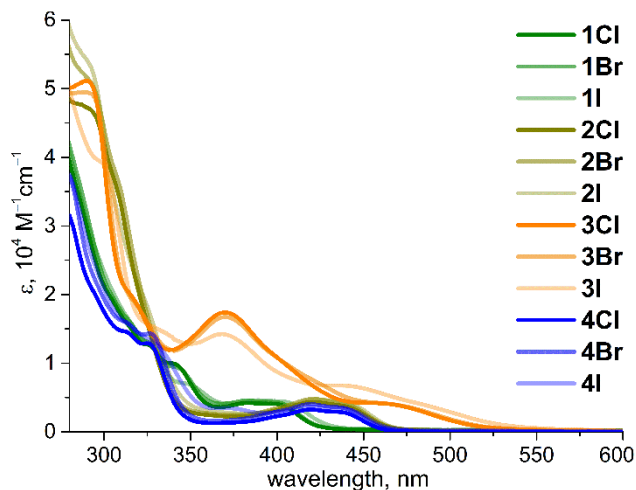

**Figure S26.** UV-vis spectra of Pt(II) complexes **1Y–4Y** (Y = Cl, Br, I), DCE solution  $10^{-5}$  M, r.t.

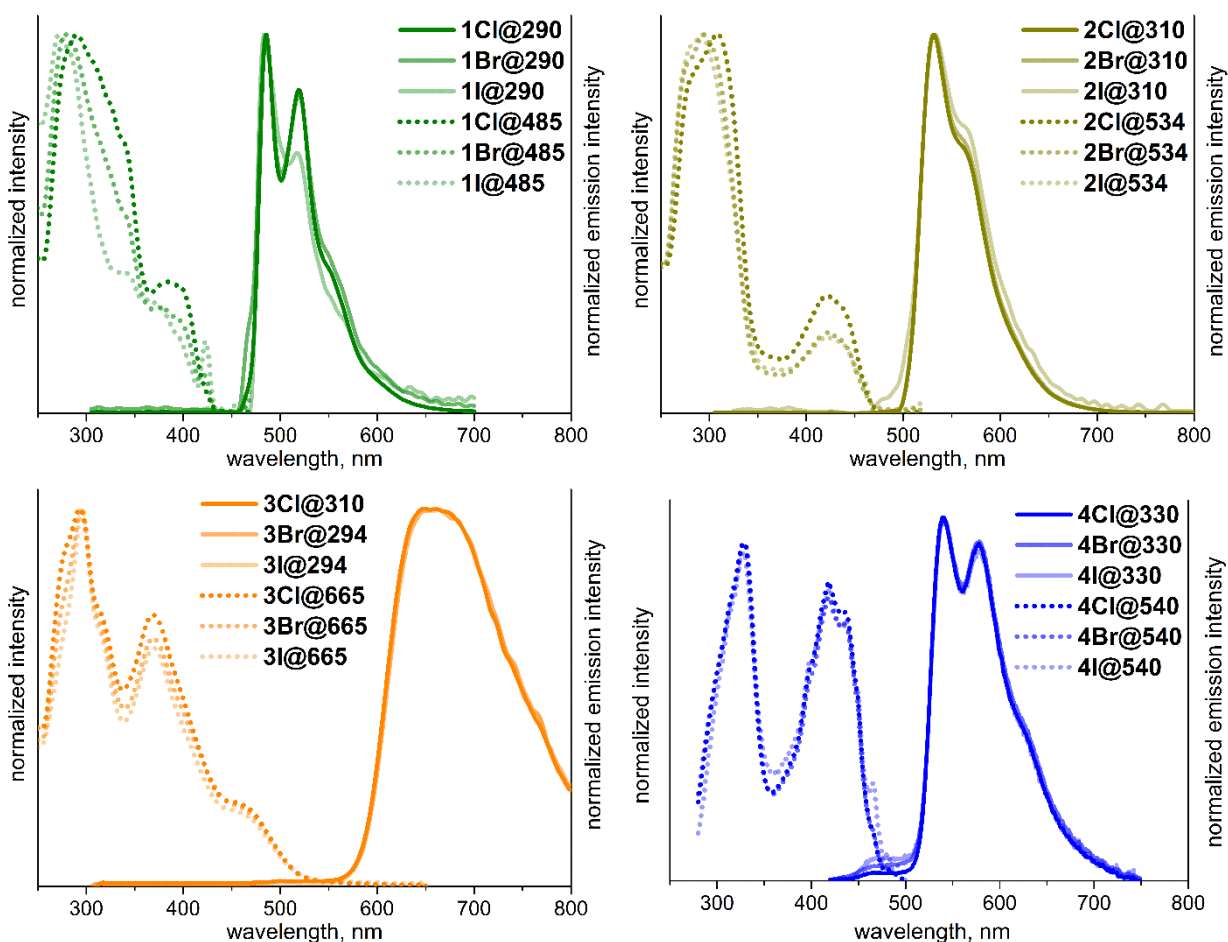

**Figure S27.** Normalized excitation (dot line) and normalized emission (solid line) spectra of Pt(II) complexes **1Y–4Y** (Y = Cl, Br, I); DCE solution  $10^{-5}$  M, r.t., registration and excitation wavelengths are indicated on diagram.

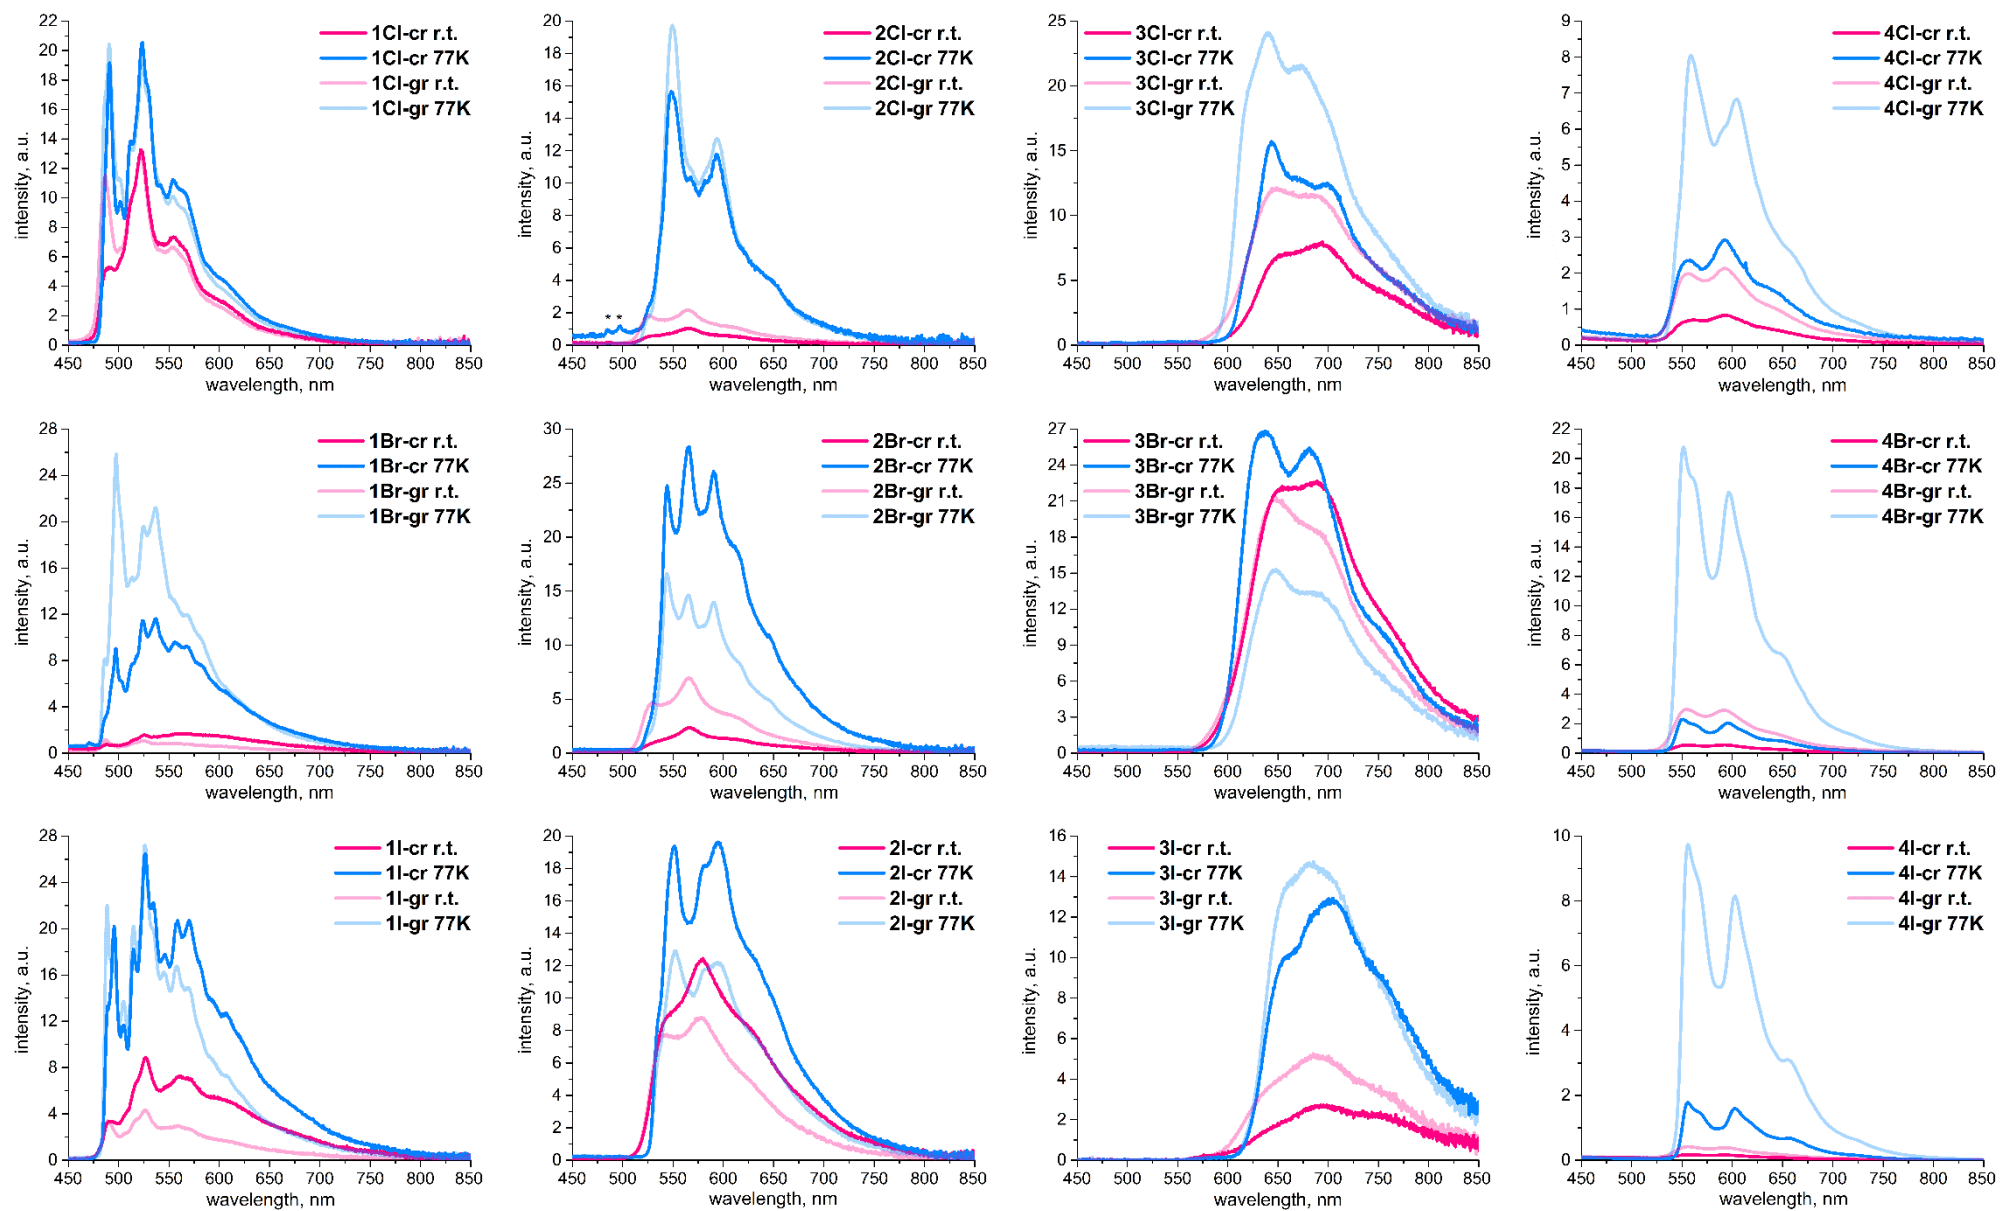

**Figure S28.** Variable temperature solid-state emission spectra of complexes **1Y–4Y** (Y = Cl, Br, I);  $\lambda_{\text{ext}}$  351 nm (**1Y–3Y**) and 365 nm (**4Y**); cr = crystals, gr = ground powder.

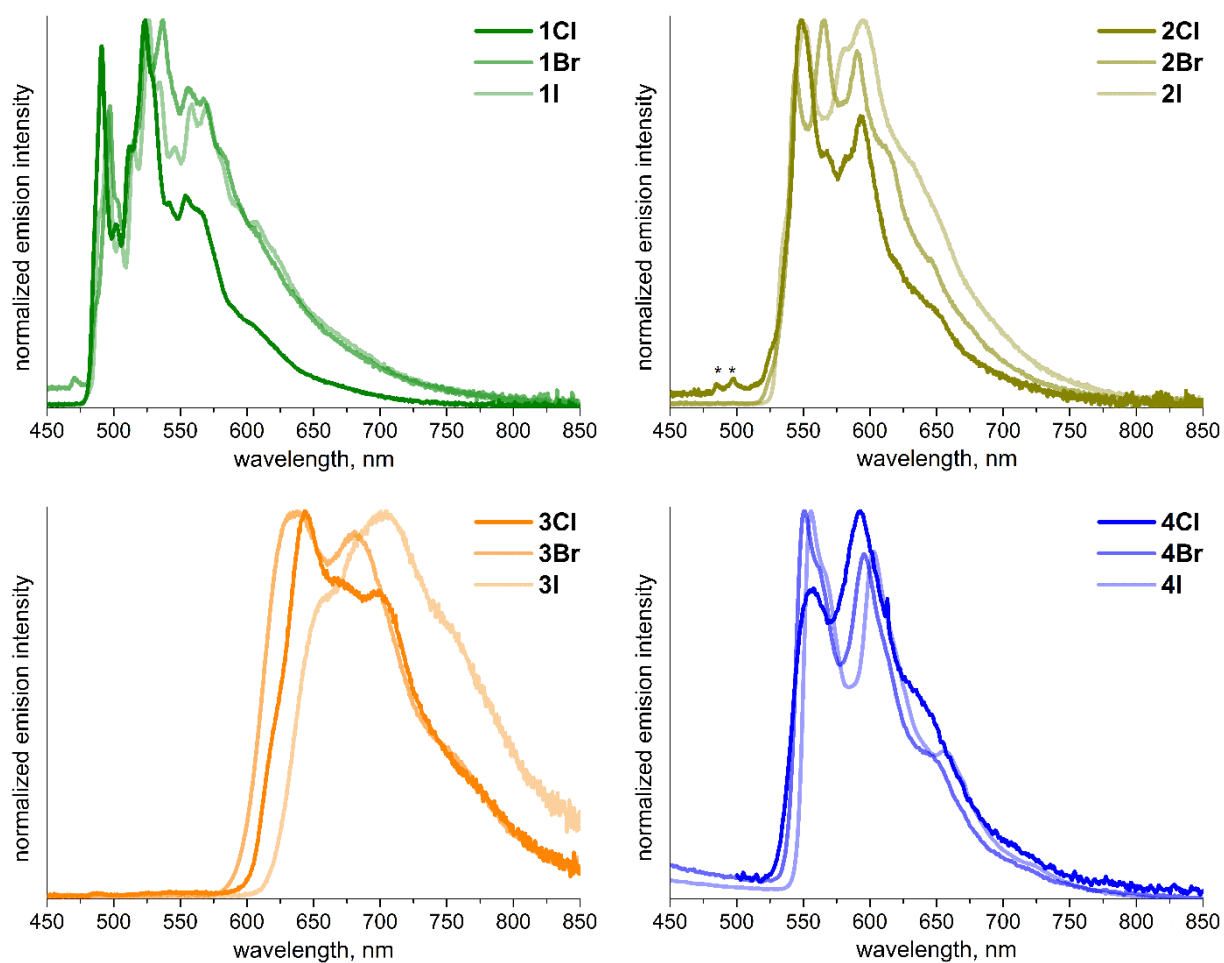

**Figure S29.** Normalized emission spectra of complexes **1Y–4Y** (Y = Cl, Br, I) in solid-state, crystalline samples, 77K.

**Table S7.** Photophysical properties of complexes **1Y–4Y** (Y = Cl, Br, I) in solid state, crystalline samples,  $\lambda_{\text{exct}}$  351 nm.

| Complex    | $\lambda_{\text{em}}$ , nm                 |                                                      | $\tau_{\text{av}}$ , <sup>#</sup> ns |       |
|------------|--------------------------------------------|------------------------------------------------------|--------------------------------------|-------|
|            | 298 K                                      | 77 K                                                 | 298 K                                | 77 K  |
| <b>1Cl</b> | 490, 523, 557, 604 <sup>sh</sup>           | 480, 523, 554, 608 <sup>sh</sup>                     | 740                                  | 5328  |
| <b>1Br</b> | 489, 526, 566                              | 498, 524, 536, 557                                   | 1211                                 | 6840  |
| <b>1I</b>  | 491, 526, 561, 608 <sup>sh</sup>           | 496, 526, 559, 570, 607 <sup>sh</sup>                | 341                                  | 3795  |
| <b>2Cl</b> | 528, 565, 611                              | 548, 593, 646 <sup>sh</sup>                          | 488                                  | 10820 |
| <b>2Br</b> | 535 <sup>sh</sup> , 566, 613 <sup>sh</sup> | 544, 566, 590, 611 <sup>sh</sup> , 646 <sup>sh</sup> | 347                                  | 11450 |
| <b>2I</b>  | 544 <sup>sh</sup> , 580, 623 <sup>sh</sup> | 551, 595, 629 <sup>sh</sup>                          | 363                                  | 10465 |
| <b>3Cl</b> | 650 <sup>sh</sup> , 694, 761 <sup>sh</sup> | 643, 699, 769 <sup>sh</sup>                          | 715                                  | 3290  |
| <b>3Br</b> | 655, 688, 760 <sup>sh</sup>                | 638, 682, 753 <sup>sh</sup>                          | 781                                  | 3905  |
| <b>3I</b>  | 642 <sup>sh</sup> , 692, 754 <sup>sh</sup> | 657 <sup>sh</sup> , 700, 754 <sup>sh</sup>           | 120                                  | 2698  |
| <b>4Cl</b> | 558 <sup>sh</sup> , 595, 642 <sup>sh</sup> | 555, 593, 640 <sup>sh</sup>                          | 2752                                 | 15062 |
| <b>4Br</b> | 554, 593, 643 <sup>sh</sup>                | 551, 596, 648 <sup>sh</sup>                          | 6345                                 | 12722 |
| <b>4I</b>  | 557, 594, 641 <sup>sh</sup>                | 556, 603, 658                                        | 1764                                 | 10224 |

<sup>#</sup> Amplitude average lifetime  $\tau_{\text{aver}} = \sum A_i \tau_i$  was calculated according to published method.<sup>8</sup>

**Table S8.** Photophysical properties of complexes **1Y–4Y** (Y = Cl, Br, I) in solid state, ground powder,  $\lambda_{\text{exct}}$  351 nm.

| Complex    | $\lambda_{\text{em}}$ , nm                 |                                                      | $\tau_{\text{av}}$ , <sup>#</sup> ns |       | $\Phi^{**}$ , % |
|------------|--------------------------------------------|------------------------------------------------------|--------------------------------------|-------|-----------------|
|            | 298 K                                      | 77 K                                                 | 298 K                                | 77 K  |                 |
| <b>1Cl</b> | 486, 522, 553, 601 <sup>sh</sup>           | 491, 523, 554, 604 <sup>sh</sup>                     | 781                                  | 7137  | 1.7             |
| <b>1Br</b> | 487, 525, 557                              | 497, 537, 569 <sup>sh</sup>                          | 1163                                 | 7406  | 1.15            |
| <b>1I</b>  | 489, 527, 560, 609 <sup>sh</sup>           | 489, 526, 559, 608 <sup>sh</sup>                     | 439                                  | 4488  | 0.15            |
| <b>2Cl</b> | 526, 566, 612 <sup>sh</sup>                | 550, 594, 545 <sup>sh</sup>                          | 410                                  | 10870 | 0.47            |
| <b>2Br</b> | 529, 567, 612 <sup>sh</sup>                | 544, 566, 591, 614 <sup>sh</sup> , 644 <sup>sh</sup> | 340                                  | 11920 | 0.57            |
| <b>2I</b>  | 540, 578, 620 <sup>sh</sup>                | 552, 595, 632 <sup>sh</sup>                          | 216                                  | 7265  | 0.19            |
| <b>3Cl</b> | 646, 689, 753 <sup>sh</sup>                | 639, 674, 751 <sup>sh</sup>                          | 671                                  | 3096  | 1.22            |
| <b>3Br</b> | 646, 692 <sup>sh</sup> , 757 <sup>sh</sup> | 647, 694 <sup>sh</sup> , 758 <sup>sh</sup>           | 562                                  | 2988  | 1.06            |
| <b>3I</b>  | 642 <sup>sh</sup> , 685, 753 <sup>sh</sup> | 659 <sup>sh</sup> , 683, 746 <sup>sh</sup>           | 104                                  | 2074  | n/a             |
| <b>4Cl</b> | 555, 593, 645 <sup>sh</sup>                | 559, 605, 659 <sup>sh</sup>                          | 5468                                 | 16072 | 6.0             |
| <b>4Br</b> | 555, 592, 642 <sup>sh</sup>                | 552, 597, 650 <sup>sh</sup>                          | 6737                                 | 12992 | 2.8             |
| <b>4I</b>  | 556, 596, 630 <sup>sh</sup>                | 557, 603, 657                                        | 1598                                 | 10209 | 1.54            |

<sup>#</sup> Amplitude average lifetime  $\tau_{\text{aver}} = \sum A_i \tau_i$  was calculated according to published method.<sup>8</sup> <sup>\*\*</sup> 298 K

**Table S9.** Observed lifetime (ns) of complexes **1Y–4Y** (Y = Cl, Br, I) in the solid-state (cr = crystalline samples, gr = ground powder).

|               | 298 K    |                |          |                |          |                | 77 K     |                |          |                |          |                |
|---------------|----------|----------------|----------|----------------|----------|----------------|----------|----------------|----------|----------------|----------|----------------|
|               | $\tau_1$ | A <sub>1</sub> | $\tau_2$ | A <sub>2</sub> | $\tau_3$ | A <sub>3</sub> | $\tau_1$ | A <sub>1</sub> | $\tau_2$ | A <sub>2</sub> | $\tau_3$ | A <sub>3</sub> |
| <b>1Cl_cr</b> | 136      | 0.11           | 463      | 0.56           | 1435     | 0.33           | 893      | 0.03           | 3298     | 0.46           | 8826     | 0.45           |
| <b>1Cl_gr</b> | 187      | 0.13           | 603      | 0.69           | 1931     | 0.18           | 1642     | 0.13           | 5167     | 0.59           | 13911    | 0.28           |
| <b>1Br_cr</b> | 47.9     | 0.30           | 312      | 0.27           | 2570     | 0.43           | 516      | 0.15           | 3747     | 0.47           | 12997    | 0.38           |
| <b>1Br_gr</b> | 80.3     | 0.40           | 512      | 0.24           | 2808     | 0.36           | 805      | 0.12           | 4741     | 0.57           | 14765    | 0.31           |
| <b>1I_cr</b>  | 30.8     | 0.51           | 157      | 0.24           | 1159     | 0.25           | 360      | 0.23           | 1191     | 0.47           | 9368     | 0.30           |
| <b>1I_gr</b>  | 33.5     | 0.33           | 128      | 0.37           | 1235     | 0.30           | 416      | 0.23           | 2198     | 0.45           | 10614    | 0.32           |
| <b>2Cl_cr</b> | 143      | 0.43           | 487      | 0.49           | 2211     | 0.08           | 1103     | 0.04           | 7509     | 0.56           | 16328    | 0.40           |
| <b>2Cl_gr</b> | 73       | 0.14           | 284      | 0.59           | 878      | 0.27           | 3949     | 0.14           | 10661    | 0.80           | 28104    | 0.06           |
| <b>2Br_cr</b> | 104      | 0.23           | 357      | 0.63           | 883      | 0.14           | 721      | 0.05           | 7339     | 0.43           | 15923    | 0.52           |
| <b>2Br_gr</b> | 86       | 0.18           | 309      | 0.63           | 680      | 0.19           | 1444     | 0.09           | 10640    | 0.79           | 27941    | 0.12           |
| <b>2I_cr</b>  | 21.5     | 0.02           | 161      | 0.34           | 483      | 0.64           | 1604     | 0.07           | 7013     | 0.41           | 14271    | 0.52           |
| <b>2I_gr</b>  | 93       | 0.49           | 264      | 0.47           | 1176     | 0.04           | 722      | 0.11           | 3901     | 0.43           | 11960    | 0.46           |
| <b>3Cl_cr</b> | 107      | 0.16           | 453      | 0.49           | 1349     | 0.35           | 454      | 0.04           | 2226     | 0.38           | 4187     | 0.58           |
| <b>3Cl_gr</b> | 110      | 0.12           | 455      | 0.51           | 1156     | 0.37           | 386      | 0.05           | 1956     | 0.39           | 4111     | 0.56           |
| <b>3Br_cr</b> | 57       | 0.10           | 355      | 0.44           | 1342     | 0.46           | 408      | 0.04           | 2288     | 0.32           | 4911     | 0.65           |
| <b>3Br_gr</b> | 64       | 0.16           | 327      | 0.51           | 1168     | 0.39           | 207      | 0.05           | 1516     | 0.36           | 4104     | 0.59           |
| <b>3I_cr</b>  | 23       | 0.51           | 111      | 0.32           | 435      | 0.17           | 172      | 0.08           | 1243     | 0.32           | 3813     | 0.60           |
| <b>3I_gr</b>  | 23       | 0.55           | 108      | 0.36           | 591      | 0.09           | 155      | 0.12           | 1022     | 0.40           | 3435     | 0.48           |
| <b>4Cl_cr</b> | 340      | 0.05           | 1286     | 0.34           | 3780     | 0.61           | 4355     | 0.07           | 15885    | 0.93           | –        | –              |
| <b>4Cl_gr</b> | 1688     | 0.16           | 6166     | 0.84           | –        | –              | 6582     | 0.09           | 17028    | 0.91           | –        | –              |
| <b>4Br_cr</b> | 1201     | 0.07           | 3797     | 0.39           | 8778     | 0.55           | 4524     | 0.09           | 13570    | 0.91           | –        | –              |
| <b>4Br_gr</b> | 639      | 0.02           | 2992     | 0.26           | 8279     | 0.72           | 3451     | 0.08           | 13778    | 0.92           | –        | –              |
| <b>4I_cr</b>  | 306      | 0.09           | 970      | 0.41           | 2673     | 0.50           | 2244     | 0.05           | 10601    | 0.95           | –        | –              |
| <b>4I_gr</b>  | 136      | 0.03           | 748      | 0.35           | 2171     | 0.61           | 935      | 0.02           | 5755     | 0.30           | 12454    | 0.68           |

**Table S10.** Selected parameters of the **1Cl–4Cl** optimized geometries (in dichloroethane solution). The corresponding experimental parameters in crystal are given in parentheses.

| Complex    | Distance, Å |                | Angle, °      |               |
|------------|-------------|----------------|---------------|---------------|
| <b>1Cl</b> | Pt1–N2      | 2.025 (2.027)  | N2–Pt1–C15    | 95.6 (96.4)   |
|            | Pt1–N1      | 2.018 (2.006)  | C15–Pt1–N1    | 81.1 (82.1)   |
|            | Pt1–C15     | 1.981 (1.980)  | N1–Pt1–Cl1    | 96.1 (95.1)   |
|            | Pt1–Cl1     | 2.427 (2.397)  | Cl1–Pt1–N2    | 87.1 (86.4)   |
| <b>2Cl</b> | N2A–Pt1A    | 2.026 (2.02)   | N2A–Pt1A–Cl1A | 88.8 (89.5)   |
|            | Pt1A–Cl1A   | 2.399 (2.369)  | Cl1A–Pt1A–N1A | 95.7 (96.1)   |
|            | Pt1A–N1A    | 2.046 (2.03)   | N1A–Pt1A–C17A | 79.0 (79.6)   |
|            | Pt1A–C17A   | 1.937 (1.92)   | C17A–Pt1A–N2A | 96.4 (94.8)   |
| <b>3Cl</b> | Cl1A–Pt1A   | 2.441 (2.431)  | Cl1A–Pt1A–N1A | 102.0 (102.2) |
|            | Pt1A–N1A    | 2.057 (2.03)   | N1A–Pt1A–C21A | 80.7 (81.8)   |
|            | Pt1A–C21A   | 1.971 (1.97)   | C21A–Pt1A–N2A | 93.5 (91.6)   |
|            | Pt1A–N2A    | 2.021 (1.99)   | N2A–Pt1A–Cl1A | 83.4 (83.5)   |
| <b>4Cl</b> | Pt1–N2      | 2.028 (2.018)  | N2–Pt1–C17    | 96.2 (94.5)   |
|            | Pt1–N1      | 2.030 (2.022)  | C17–Pt1–N1    | 79.4 (79.7)   |
|            | Pt1–C17     | 1.953 (1.949)  | N1–Pt1–Cl1    | 96.3 (97.20)  |
|            | Pt1–Cl1     | 2.397 (2.3738) | Cl1–Pt1–N2    | 88.2 (88.68)  |

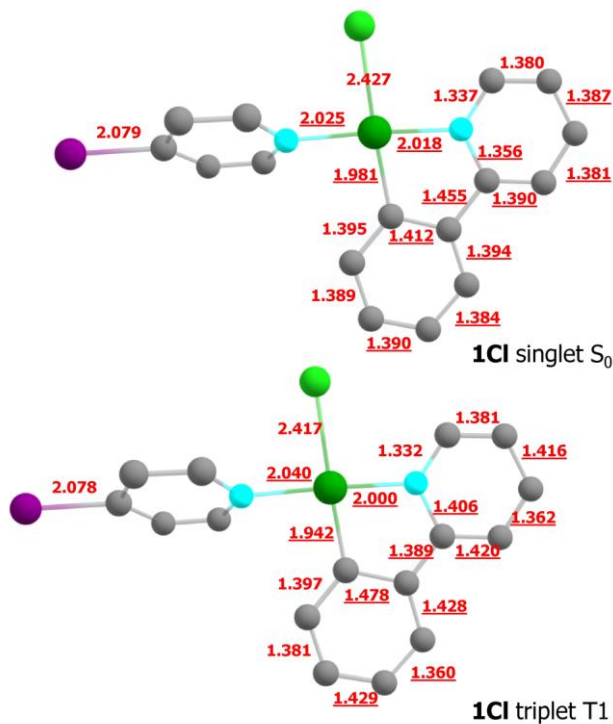

**Figure S30.** Selected bond lengths ( $\text{\AA}$ ) in the  $S_0$  (top) and  $T_1$  (bottom) optimized structures of **1Cl**. The distances changing by more than  $0.01 \text{ \AA}$  on going from  $S_0$  to  $T_1$  are underlined.

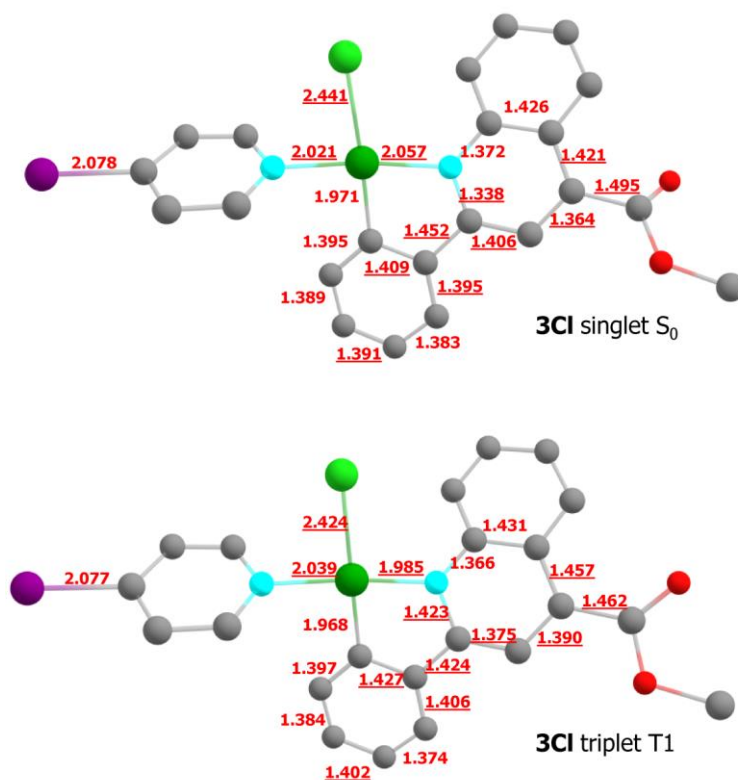

**Figure S31.** Selected bond lengths ( $\text{\AA}$ ) in the  $S_0$  (top) and  $T_1$  (bottom) optimized structures of **3Cl**. The distances changing by more than  $0.01 \text{ \AA}$  on going from  $S_0$  to  $T_1$  are underlined.



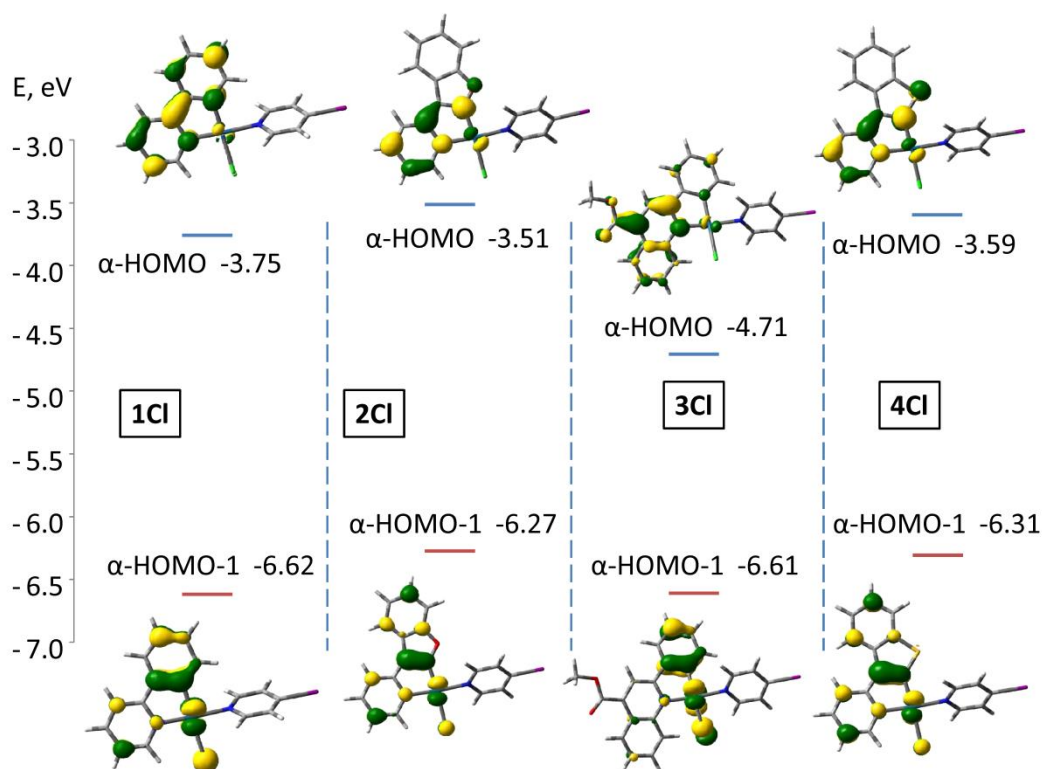

**Figure S32.** Isosurfaces (0.05) and energies (eV) of the **1Cl–4Cl**  $\alpha$ -HOMO and  $\alpha$ -HOMO-1 in the  $T_1$  state.

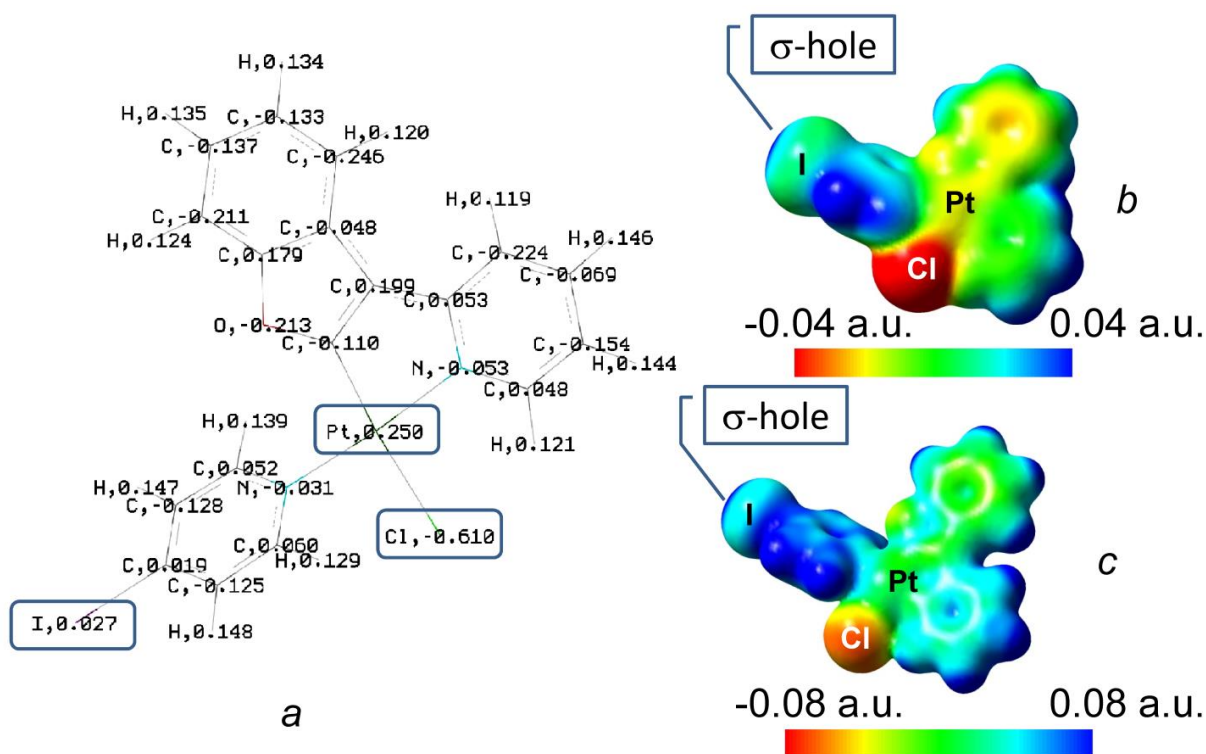

**Figure S33.** Mulliken charge distribution (a) and ESP mapped on the ED isosurface (b, c) in the **2Cl** molecule in dichloroethane solution. The ED isovalue is 0.001 a.u. (a) and 0.01 a.u. (b).

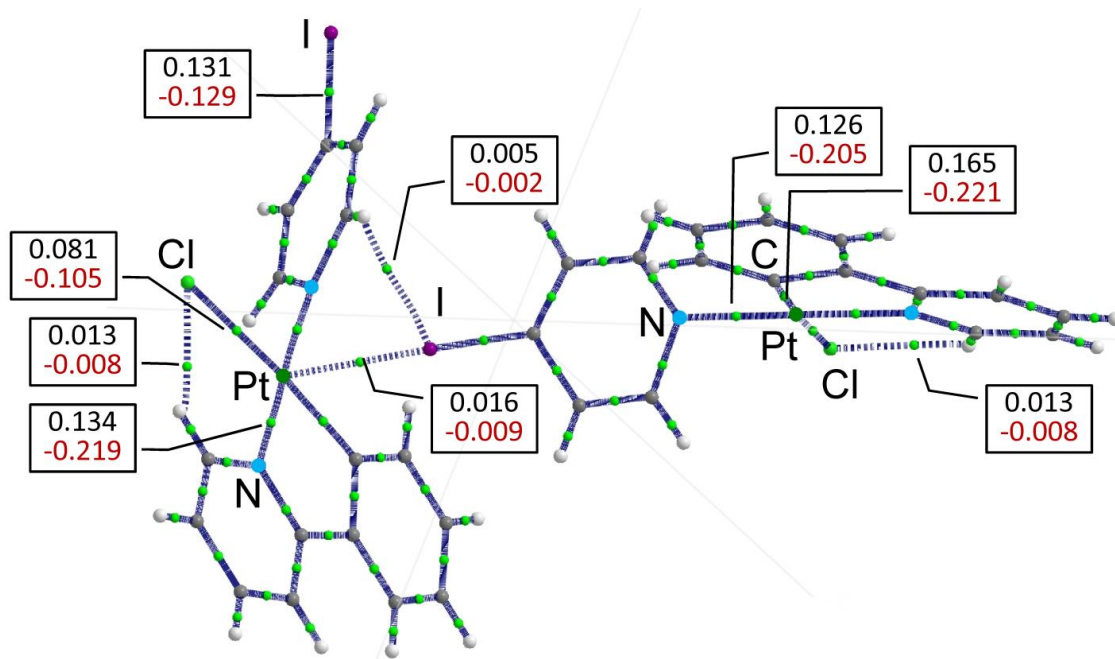

**Figure S34.** Molecular graph of the **1Cl** dimer obtained from analysis of the electron density topology. Bonding critical points (3,-1) are presented as small green spheres. Electron densities (a.u., black) and potential energy densities (a.u., red) are given for selected critical points.

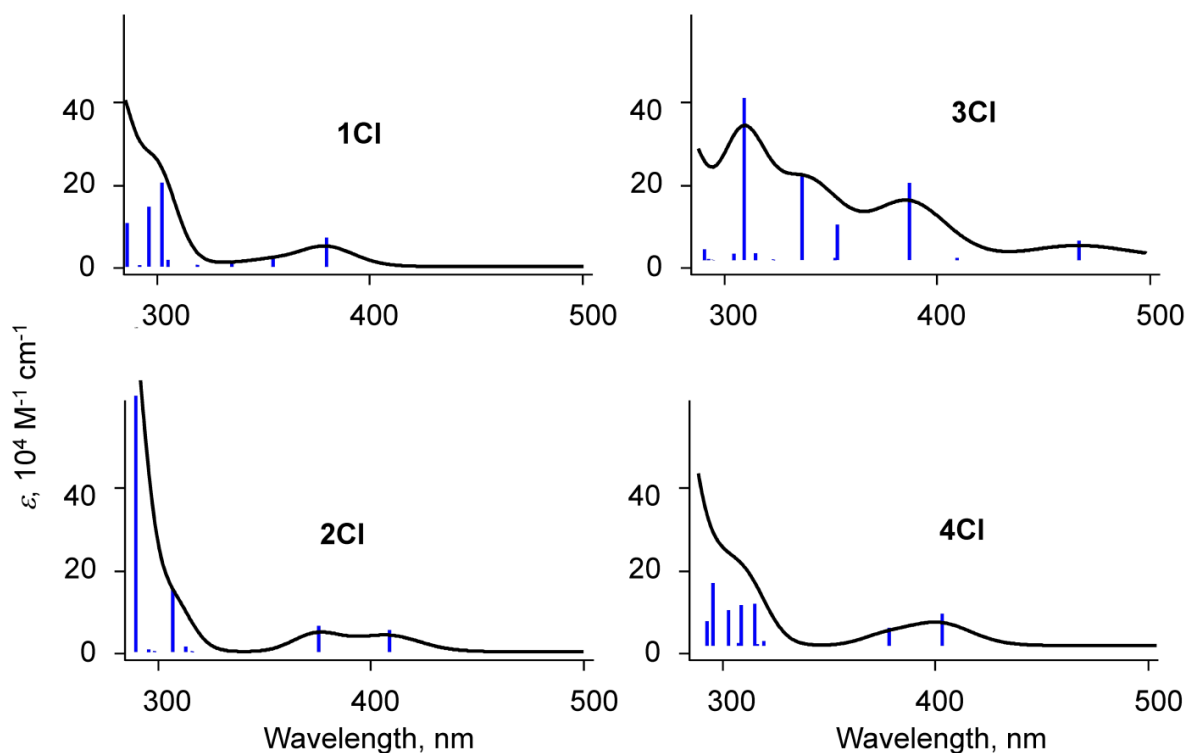

**Figure S35.** Calculated electronic absorption spectra of **1Cl–4Cl** in dichloroethane.

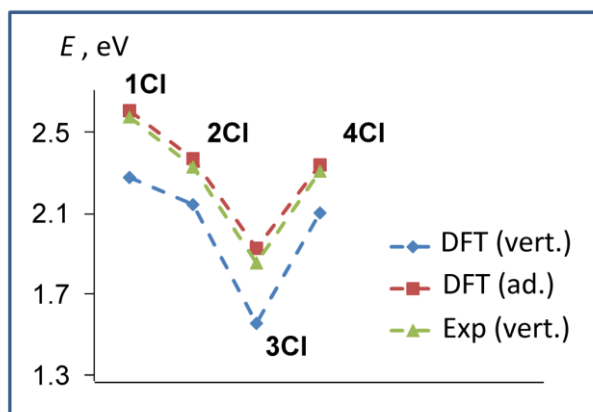

**Figure S36.** Calculated adiabatic and vertical energies of the  $T_1 \rightarrow S_0$  emission in **1Cl–4Cl** (dichloroethane solution). The experimental vertical energies are given for comparison.

## References

- (1) CrysAlisPro, Rigaku Oxford Diffraction; Agilent Technologies: Version 1.171.39.35a, 2017.
- (2) Sheldrick, G. M. A Short History of SHELX. *Acta Crystallogr. Sect. A* **2008**, *64* (1), 112–122. <https://doi.org/10.1107/S0108767307043930>.
- (3) Sheldrick, G. M. SHELXT - Integrated Space-Group and Crystal-Structure Determination. *Acta Crystallogr. Sect. A Found. Crystallogr.* **2015**, *71*, 3–8. <https://doi.org/10.1107/S2053273314026370>.
- (4) Sheldrick, G. M. Crystal Structure Refinement with SHELXL. *Acta Crystallogr. Sect. C* **2015**, *71*, 3–8. <https://doi.org/10.1107/S2053229614024218>.
- (5) Dolomanov, O. V.; Bourhis, L. J.; Gildea, R. J.; Howard, J. A. K.; Puschmann, H. OLEX2: A Complete Structure Solution, Refinement and Analysis Program. *J. Appl. Crystallogr.* **2009**, *42* (2), 339–341. <https://doi.org/10.1107/S0021889808042726>.
- (6) Lommerse, J. P. M.; Stone, A. J.; Taylor, R.; Allen, F. H. The Nature and Geometry of Intermolecular Interactions between Halogens and Oxygen or Nitrogen. *J. Am. Chem. Soc.* **1996**, *118* (13), 3108–3116. <https://doi.org/10.1021/ja953281x>.
- (7) Bondi, A. Van Der Waals Volumes and Radii. *J. Phys. Chem.* **1964**, *68* (3), 441–451. <https://doi.org/10.1021/j100785a001>.
- (8) Sillen, A.; Engelborghs, Y. The Correct Use of “Average” Fluorescence Parameters. *Photochem. Photobiol.* **1998**, *67* (5), 475–486. <https://doi.org/10.1111/j.1751-1097.1998.tb09082.x>.
